# Supplementary material
Source: PubMed Central journal article supplement (PMC5542579)
Supplement: NIHMS866528-supplement-Supp_PDF.pdf [file NIHMS866528-supplement-Supp_PDF.pdf]

# **SUPPLEMENTAL MATERIAL**

## **Supplemental Methods**

### **Generation the ATF3 knockout mice and fibroblast-specific over-expression of ATF3 mice**

The generation/characterization of whole-body ATF3-knockout mice was described previously<sup>1</sup>. In brief, ATF3 gene is comprised of five exons A-E. The knockout allele lacks exon B, which contains the AUG initiation codon. The ATF3 knockout mice were backcrossed to the C57BL/6J background over 10 generations. We used a conditional transgenic approach, Cre/loxP recombination system, to generate transgenic mice that over-express ATF3 in a tissue-specific manner. Conditional transgenic founder mice expressing ATF3 gene (ATF3<sup>fl/fl</sup> TG) were generated by Cyagen Biosciences Inc. (Guangzhou, Guanddong, China) in the C57BL/6 background. Briefly, pRP.ExBi-EF1A-loxp-stop-loxp-mAtf3 vectors were linearized with gel purified, microinjected into fertilized mouse zygotes, and transferred to pseudopregnant females. The scheme for construction of the targeting vectors is shown in Supplemental Figure 4A. PCR for genotyping was performed with primers: 5'-TTCTCCTTGG AATTTGCCCTTT-3'(sense) and 5'-CAAGCTAATTCCTGCAGGTCGA-3'(antisense), which yielded 226 bp products for ATF3 fl/fl TG (Supplemental Figure 4B). The internal control PCR primers: 5'-ACTCCAAGGCCACTTATCACC-3' (sense); 5'-ATTGTTACCAACTGGGACGACA-3' (antisense). The *col1a2*-Cre/ERT mice, containing a CreER(T) recombinase gene located stream of a *proa2(I)* collagen promoter/enhancer which confers fibroblast-specific CreER (T) gene expression, were purchased from JAX Lab. ATF3<sup>fl/fl</sup> mice were bred with *col1a2*-Cre/ERT mice to achieve fibroblast-specific ATF3 over-expression in the adult. Mice were intraperitoneally treated with 2mg/Kg of tamoxifen dissolved in corn oil (2mg/Kg) for 7 days at 8-10 weeks of age<sup>2</sup>.

### **Bone marrow transplantation**

BM transplantation was performed as previously described<sup>3</sup>. Briefly, the 8-week old recipient mice (WT or ATF3KO) were exposed to 10 gray dose total-body irradiation from a cobalt-60 source. BM cells from 8 weeks old sex-matched donor mice (WT or ATF3KO) were collected in RPMI1640 medium. Four hours after irradiation,  $1 \times 10^7$

BM cells in 200 µl from donor mice were injected into recipient mice via caudal vein. Reconstituted mice were conditioned with drinking water containing 100mg/l levofloxacin and 100mg/L fluconazole for two weeks. 10 weeks after BM transplantation, reconstituted mice were subjected to saline or Angiotensin (Ang) II infusion (1000 ng/kg/min) for 12 weeks. Ang II was purchased Sigma-Aldrich (catalog number A9525). Ang II is a synthetic peptide, with purity noted to be  $\geq 93\%$  (verified by HPLC). The molecular formula is  $C_{50}H_{71}N_{13}O_{12}$ . The efficiency of BM reconstitution was evaluated by genotyping genomic DNA isolated from BM cells.

### **Transthoracic echocardiography**

Cardiac function was evaluated by the Vevo 770 high-resolution microimaging system (Visualsonic, Toronto, Canada). The heart was viewed from the parasternal short-axis in 2D mode. The left ventricular wall thickness and chamber dimension were measured in M-mode.

### **Histopathology analysis**

Histopathology analysis was performed. Briefly, heart tissues were fixed, embedded, and sectioned into 5µm thick slices. Sections were stained with Masson's trichrome (collagen, blue; cytoplasm, red/pink) for collagen deposition analysis. Sections were stained with wheat germ agglutinin (WGA) to assess cellular hypertrophy. For immunohistochemistry, heart section were incubated with antibodies against  $\alpha$ -smooth muscle actin ( $\alpha$ -SMA) and SM-22 $\alpha$  at 4°C overnight, then with secondary antibodies at 4°C for 1 hour and detected with 3, 3'-diaminobenzidine, and sections were counterstained with hematoxylin. For immunofluorescence, frozen heart sections or cells were labeled with primary antibodies ATF3, Col1a2, Col1a1, Col2a1, CD31, SM22,  $\alpha$ -actinin, and GFP, and then incubated with Alexa Fluor 555-, 488- or 633-conjugated secondary antibody (Jackson ImmunoResearch Laboratories, West Grove, PA). Immunohistochemistry images were captured by a Nikon Eclipse TE2000-S microscope (Nikon, Japan), and analyzed by a person blinded to treatment using Image Pro Plus 3 (Nikon). Immunofluorescence images were captured with Leica ST5 laser scanning confocal microscope.

### **In situ hybridization**

In situ hybridization (ISH) was performed utilizing the Panomics QuantiGene ViewRNA ISH tissue assay (Affymetrix, Santa Clara, CA) as previously described<sup>4</sup>. Mouse hearts were fixed in 10% formaldehyde and embedded in paraffin. 5 micron sections were cut, deparaffinized, boiled in pre-treatment solution, and digested with proteinase K. Heart sections were hybridized for 3 hours at °C with a custom designed probe against ATF3 and DDR2, ATF3 and CD68 or ATF3 and Colla1 (Affymetrix, Santa Clara, CA). Bound probes were amplified per protocol from Panomics using PreAmp and Amp molecules. Working Label Probe oligonucleotides conjugated to 6-AP were added. Fast Blue Substrate was used to produce the signal for DDR2 or CD68 or ATF3 (blue dots). AP-Enhancer solution was added to each tissue section after washing. Working Label Probe oligonucleotides conjugated to 1-AP were added; Fast Red Substrate produced the signal for ATF3 or Colla1 (red dots). Slides were counterstained with Hematoxylin. Images were taken a by Nikon Eclipse TE2000-S microscope (Nikon, Tokyo, Japan).

### **Human heart samples**

Human hypertrophic heart tissue samples were obtained from patients previously diagnosed with HCM, undergoing septal myectomy surgery. Control samples were obtained from normal heart donor left ventricles. All specimens were processed immediately after surgery and stored at less than -80°C, until total RNA and protein were extracted. The local Institutional Review Board of the Institute of Biophysics and Anzhen Hospital approved all studies involving human heart tissue samples.

### **RNA-sequencing and data analysis**

WT mice were infused with Ang II for 0, 7, and 28 days. Hearts were collected for RNA extraction. Cardiac fibroblasts were isolated from heart of WT and ATF3KO mice after Ang II infusion for 7 days. Cardiac fibroblasts were pretreated with p38 inhibitor (SB203580) or control for 1 hour, and stimulated by Ang II for another 24 hours. The total RNA of mouse heart tissue, mouse cardiac fibroblasts, or human heart tissue was extracted by TRIZol method (Invitrogen). The mRNA was reverse transcribed into double strand cDNA fragments. Library construction was performed by Illumina's TruSeq RNA Library Prep Kit per manufacturer's protocol (Illumina, San Diego, CA).

Final library quality control was performed by DNA High Sensitivity Qubit Kit (Invitrogen), the Bioanalyzer High Sensitivity Chip Kit (Agilent), and the qPCR machine (Agilent). qPCR was performed via Illumina Universal Library Quantification Kit (KAPA Biosystems). RNA libraries were then sequenced at 10pM on the Illumina HiSeq 2000 to generate 100 bp pair-end reads. After adaptor-removing and quality control filtering, the clean reads were mapped to mouse genome (Mm9) using Tophat2 (v2.0.9). Cufflink (v2.0.0) was used to identify differentially expressed genes (DEGs) between samples. Significant DEGs of each pairwise comparison were selected ( $p$  value $<0.05$ ). Pathway analysis, predominantly based on the Kyoto Encyclopedia of Genes and Genomes (KEGG) database, was employed to determine the significant functions and pathways of DEGs. Only pathway categories with a FDR-corrected P-value less than 0.05 were chosen. Path-Net was built per interactions between KEGG database pathways to permit systematic identification of interactions between significant pathways identified in cardiac fibroblast from Ang II-infused ATF3KO mice<sup>5</sup>. The transcriptome data of saline and Ang II infusion model has been uploaded into a public database (accession number GES89712). The transcriptome data of heart tissue from normal and HCM patients has been uploaded into a public database (accession number GSE89714).

### **Microarray analysis**

WT mice were subjected to TAC or sham operation for 28 days. Total mouse heart RNAs were extracted. The mRNA microarray profiling was performed by Affymetrix GeneChip Mouse Genome 430 2.0 Array (Santa Clara, CA). Total RNA labeling, microarray hybridization, and scanning were performed per manufacturer's manual. Raw intensity signals of each mouse were scanned with GenePiX Personal 4000B (Molecular Devices Corporation, Sunnyvale, CA, USA) and quantified using GenePix Pro 4.0 software (Molecular Devices Corporation, Downingtown, PA, USA). Differentially expressed genes between two groups were filtered with criteria  $p < 0.05$ ; fold change  $> 1.5$ . The microarray data has been uploaded into a public database (accession number GES89493).

### **Quantitative RT-PCR (qRT-PCR) analysis**

Heart tissue and CF RNA was extracted by Trizol reagent method (Invitrogen). Total RNA was used for first-strand cDNA synthesis with M-MLV reverse transcriptase (Promega, Madison, WI). qRT-PCR was performed utilizing SYBR Green Master Mix (Takara, Otsu, Shiga, Japan) on the iCycler iQ system (Bio-Rad). PCR conditions included initial denaturation at 95°C for 5 minutes, 95°C for 45 seconds, and 60°C for 1 minute for 45 cycles. Gene expression levels were normalized to GAPDH. All samples were run in duplicate. The following of primers for genes:

ATF3 5'-GCTGGAGTCAGTTACCGTCAA-3'; 5'-CGCCTCCTTTTCTCTCAT-3';

$\alpha$ -SMA 5'-TCCTGACGCTGAAGTATCCGATA-3'; 5'-GGCCACACGAAGCTCGTTAT-3';

ANP 5'-CACAGATCTGATGGATTTC AAGA-3'; 5'-CCTCATCTTCTACCGGCATC-3';

Myh7 5'-CGCATCAAGGAGCTCACC-3'; 5'-CTGCAGCCGCAGTAGGTT-3'

Map2K3 5'-CTGAAGCAGGTGGTGGAGGAG-3'; 5'-TGGGCCAGTCCCTATGAATCC-3'

TGF- $\beta$ 2 5'-TCCCCTCCGAAAATGCCATC-3'; 5'-TGAGACATCAAAGCGGACGA-3'

TGF- $\beta$ 3 5'-ATGACCCACGTCCCCTATCA-3'; 5'-ACTCAGACTCCGAGGTCTCC-3'

BMP4 5'-CGGAAGCTAGGTGAGTTCGG-3'; 5'-AGAATCCCATCAGGGACGGA-3'

TGF- $\beta$ i 5'-GCCCATGATAAGAGGGGACG-3'; 5'-ACATCCGGTCCATGGTGAAC-3'

TGF- $\beta$ il1 5'-CCTATAGCTGGGCAAGTGGT-3'; 5'-CAAAAGGGAGCCCCATCCTT-3'

Thbs1 5'-CAATTTTCAGGGGGTGCTGC-3'; 5'-CCGTTACCCACGTTGTTGTC-3'

Thbs2 5'-ACCTCAGCAGAGGCAATGTC-3'; 5'-CCAGCCAGGTATGCTTTCCA-3'

Thbs3 5'-TCTTTTTCCCTCCCAGTCGC-3'; 5'-CTTAGCCGGTTCCTACTACCCC-3'

Smurf2 5'-GGGACATGTCTAACCCCGGA-3'; 5'-TGCACAGAGTACTGTCAGGC-3'

Col3a1 5'-ACGTAAGCACTGGTGGACAG-3'; 5'-CATTAGGCGCAGGAAGGTCA-3'

Col1a1 5'-CGATGGATTCCCGTTCGAGT-3'; 5'-CAGGAGGGCCATAGCTGAAC-3'

IL-6 5'-TCTCTGCAAGAGACTTCCATCC-3'; 5'-TTGTGAAGTAGGGAAGGCCG-3'

Itgb5 5'-AATGTGGAAGTGCCCCAAT-3'; 5'-TTGAGGCTTTGGAAGTGGC-3'

Serpine1 5'-GACGTTGTGGAAGTGCCTA-3'; 5'-TTCTCAAAGGGTGCAGCGAT-3'

Cst3 5'-TTCGCTGTGAGCGAGTACAA-3'; 5'-ACGAGCTCTACCCACCTGTA-3'

IGF-1 5'-CTCAGAAGTCCCCGTCCTA-3'; 5'-ATTTTCCGAGTTGCCTCCGT-3'

IGF-bp5 5'-AAAGCAGTGTAAGCCCTCCC-3'; 5'-TCCCCATCCACGTACTCCAT-3'

GAPDH 5'-CATGGCCTTCCGTGTTCCCTA-3'; 5'-GCGGCACGTCAGATCCA-3'

## **Chromatin Immunoprecipitation (CHIP) Assays**

ChIP assays were carried out with a EZ-ChIP kit (Millipore, Billerica, MA, USA) per manufacturer's protocol. Briefly, three biological replicates of cardiac fibroblast from ATF3KO mice transfected with Ad-con or Ad-ATF3 for 48 hours were treated with Ang II for 6 hours. Cells were cross-linked with 1% paraformaldehyde, before lysis with cold PBS/protease inhibitor. Chromatin was sheared by 10 seconds of sonication (Covaris 220) interposed with 30 second pauses, repeated 10 times. Immunoprecipitation was performed overnight at 4°C, via 4 µg of specific antibody or immunoglobulin G. Each IP sample was added to protein G agarose beads for 3 hours incubation at 4 °C. After pull-down, beads were washed 5 times. The immunocomplexes were extracted and processed by reverse cross-linking, proteinase K digestion, and DNA precipitation. The following antibodies were used for Chip: rabbit anti-ATF3 antibody (C-19, Santa Cruz), rabbit anti-acetyl-Histone H4 antibody (Millipore), and Ig G (Sigma). The following primers were used for Map2K3 Chip-PCR: forward 5'-CAGGACCACGCCAGCACAATC-3' and reverse 5'-CGGACTGTCACGCACAAACCC-3'.

## **CHIP-sequencing and Peak finding**

Input DNA and CHIP DNA were prepared for ChIP sequencing via Illumina kit per manufacturer's protocol. Briefly, each sample was subjected to end repair, followed by addition of an A base to the 3' end. Adaptor ligated DNA fragments were size-selected (175–225 bp), PCR-amplified, and further size-selected (175–225 bp). Amplification and size selection were confirmed by a BioAnalyzer. DNA fragments were pooled and sequenced on an Illumina HiSeq-1000 sequencer. CHIP sequencing data was obtained via Illumina Genome Analyzer II. 36 base pairs were analyzed by Illumina's pipeline software for quality filtering, and aligned to the Mm9 reference mouse genome. Only uniquely aligned reads were kept for subsequent bioinformatics analysis. To identify ATF3 peaks, We analyzed the Chip-seq data by the latest version of MACS2 software, with parameters "--d1 3561809 --d2 8108116 -g 60 -l 120"<sup>6</sup>. Analysis commenced a default false discovery rate (FDR) threshold of 0.0001, and a window size set at 1,000 bp. Firstly, we used a DNA input sample to eliminate biases introduced by sequencing,

chromatin structure, and sequence compositions. Secondly, the sample from ATF3-deficient CF transfected with Ad-con was used as unspecific background to identify specific ATF3 binding. Afterwards, BED Tools was used to annotate the genomic location of identified peaks.

### **Western blotting**

Western blotting was performed. Briefly, total protein from heart or cells homogenate was extracted by SDS lysis buffer containing a protease inhibitor cocktail and phosphatase inhibitors (Roche, Mannheim, Germany). The equal samples were loaded, separated, and transferred to a membrane (Pierce). The membranes were blocked and incubated overnight with primary antibody as listed below at 4°C overnight, then incubated with infrared Dye 800-conjugated secondary antibodies (Rockland Immunochemicals, Inc., Gilbertsville, Pa.) for 1 hour at room temperature. The images were quantified by the use of the Odyssey infrared imaging system (LI-COR Biosciences, Lincoln, NE).

### **Preparation of nuclear extracts and immunoprecipitation**

$1 \times 10^7$  WT cardiac fibroblasts were plated 24 hours prior to transfection with Ad-con or Ad-ATF3. 48 hours later, cells were stimulated with PBS or Ang II (1 $\mu$ M) for 6 hours and harvested. Co-immunoprecipitation was performed using Nuclear Complex Co-IP kit (Active Motif) per manufacturer's protocol. Briefly, the cellular pellet was gently resuspended in 500  $\mu$ l hypotonic buffer. 25  $\mu$ l detergent was added, and the entire mixture was centrifuged. The nuclear fraction was resuspended and incubated with 100  $\mu$ l digestion buffer and 0.5  $\mu$ l enzymatic shearing cocktail for 90 minutes. The reaction was terminated by 0.5 M EDTA. Insoluble material was removed by centrifugation. The supernatant represented nuclear extract. 0.3 mg of nuclear extract was incubated for 1 hour with protein G sepharose beads (Santa Cruz), followed by 1 hour with 4  $\mu$ g ATF3 or IgG antibody, followed by 3 additional hours with beads. Finally, beads were washed 4 times in IP washing buffer. Each bead pellet was resuspended in 8  $\mu$ l of 2 $\times$  reducing loading buffer. Samples were heated at 95°C for 5 minutes. The supernatant was subjected to western blot against HDAC1 antibody.

### **Cell Preparation**



Cardiac fibroblasts (CF) were isolated from WT or ATF3KO mice by enzymatic digestion and cultured in full DMEM medium as previously described<sup>7</sup>. WT or ATF3KO CF were treated with PBS or Ang II (100 nM) for 48 hours. ATF3KO CF were infected with LV-Map2K3 shRNA or LV-con shRNA for 48 hours and treated with Ang II or PBS for another 48 hours. ATF3<sup>-/-</sup> CF were pre-treated with p38 inhibitor (SB203580) or control for 48 hours in the absence or presence of Ang II. CF activation was evaluated via  $\alpha$ -SMA and collagen I protein expression. Cardiomyocytes (CM) were isolated from one-week mouse pups by enzymatic digestion and cultured in CM-Medium. 24 hours later, CM was starved with FBS-free CM-medium for 8 hours. The medium was exchanged with fresh isolated conditional medium collected from WT or ATF3KO CF treated with Ang II for 24 hours. CM hypertrophy was analyzed by  $\alpha$ -actinin staining and ANP mRNA expression.

### **Fluorescence-Activated Cell Sorting**

Cardiac cell suspensions were prepared as previously described<sup>8, 9</sup>. Heart cells were sorted by flow cytometry (Beckman Coulter MoFlo XDP) into populations of CD45<sup>-</sup>CD31<sup>+</sup> endothelial cells, CD45<sup>-</sup>PDGFR- $\alpha$ <sup>+</sup> cardiac fibroblasts, CD45<sup>-</sup>PDGFR- $\alpha$ <sup>-</sup>CD31<sup>-</sup> cardiomyocytes, and CD45<sup>+</sup>F4/80<sup>+</sup> macrophages. Isolated cardiac cells were utilized for RNA or proteins extraction and qRT-PCR and western-blot analysis.

### **Knocking down of Map2K3 by lentiviral short hairpin RNA (shRNA)**

The following Map2K3-targeted short hairpin RNAs were designed and synthesized by Genechem Co. Ltd (Shanghai, China). The recombinant lentivirus of small interfering RNA targeting Map2K3 (Map2K3-RNAi-lentivirus) and control lentivirus (GFP-lentivirus) were commercially prepared. Briefly, a lentivirus transfer vector (GV118) was constructed. The vector contained an ampicillin resistant gene and an enhanced green fluorescent protein gene. Expression of shRNA was driven by a U6 promoter. Packaging of viruses was performed by transient transfection of 293T cells with a transfer plasmid and 3 packaging vectors: pGC-LV, pHelper 1.0, and pHelper 2.0. Three days after transfection, lentiviral particles were collected, filtered, and concentrated by ultracentrifugation at 50,000g for 2.5 hours at 4°C. The lentiviral-shRNA was transfected into cardiac fibroblasts at a final concentration of 50 $\times$ PFU/cell (after cells

had grown to 30-50% confluence). After 96 hours, the knockdown efficiency of shRNA was evaluated by qRT-PCR. The targeting sequence of the small hairpin RNA: TGATGGAACACCCATTCTT (Map2K3-1#); TCACTATCGGAGACAGAAA (Map2K3-2#); ATGTGAAGATGTGCGACTT (Map2K3-3#).

### **Adenovirus Gene Transfer**

Adenoviral vector encoding the mouse ATF3 gene (Ad-ATF3) and negative control (Ad-con) was constructed, packaged, purified, and titrated at Genechem Co. Ltd. For adenovirus-mediated gene transfer, Ad-ATF3 or Ad-con was transfected into CF from ATF3<sup>-/-</sup> mice at a final concentration of 200×PFU/cell for 48 hours. After 48 hours, the overexpression efficiency of Ad-ATF3 was evaluated by Western-blot.

### **Cytokines measurement**

Cell culture supernatants were analyzed for mouse IL-6, Edn-1, and FGF-2 levels by sandwich ELISA kit (R&D System, Minneapolis, MN).

### **Design of LV-ATF3-mir1/133TS vectors and cell transfection**

Recombinant LV vectors containing ATF3 with 2 tandem target sequences for mmu-mir1a-3p and mmu-mir-133a-3p introduced at its 3' end (LV-ATF3-mir1/133TS) were constructed in accordance with the manufacturer's instructions. Complementary oligonucleotides contained 2 tandem targeting sequences for mmu-mir1a-3p and mmu-mir-133a-3p:5'-

ataaATACATACTTCTTTACATTCCAacgtaATACATACTTCTTTACATTCCAacgcgtCAGCTGGTTGAAGGGGACCAAAtcacCAGCTGGTTGAAGGGGACCAAAC-3'.

For ATF3-mir-1-mir-133TS vectors, mir-1 and mir-133 TS were annealed and ligated into sites of 3' UTR end of ATF3 expression cassette with EcoRI. Next, ATF3-mir1/133TS were amplified from the carrier vector with the following pairs of primers: 5'-GAGGATCCCCGGGTACCGGTCCGACCATGATGCTTCAACATCCAG-3'; 5'-CACACATTCCACAGGCTAGGTTTGGTCCCCTTCAACC-3'. The resulting PCR products were subcloned into a LV-pUbi-MCS-psSV40-EGFP vector (using AgeI/NheI restriction sites) under the control of a pUbi promoter. LV-Control-mir1/133TS vectors replace ATF3 vectors with negative control vectors. All final LV constructs were confirmed by sequencing, purified, dialyzed and titrated in 293T cells. Cardiac

fibroblasts (CF) and cardiomyocytes (CM) were isolated from 1 week-old ATF3KO mouse pups by enzymatic digestion. The LV-Con-mir1/133TS and LV-ATF3-mir1/133TS were transduced into CF and CM at a final concentration of 50PFU/cell (after cells had grown to 30-50% confluence). After 72 hours, the ATF3 expression was evaluated by WB.

### **Antibodies**

The following antibodies were used: ATF3 (SC-188) and Col 1a2 (SC-393573) from Santa Cruz Biotechnology;  $\alpha$ -SMA (A5228) and  $\alpha$ -actinin (A5044) from Sigma; HDAC1 (AB7028), GFP (Ab13970), p-smad3 (Ab52903), Vimentin (Ab8978), CD31 (Ab393573) purchased from Abcam; H4AC (8647), Map2k3 (8535S), p-p38 (4511), T-p38 (9212S), p-MK2 (3007), T-MK2 (3042S), p-JNK1/2 (4668S); T-JNK1/2 (9258S), p-ERK1/2 (4370), T-ERK1/2 (4695), IgG (14708) from Cell Signaling Technology.

## Supplemental Tables

**Supplemental Table 1. Significant transcriptional factors in the heart, after Ang II infusion 7 days or 28 days and TAC operation for 28 days**

| Gene_sym       | Description                                                | Fold change |            |            |
|----------------|------------------------------------------------------------|-------------|------------|------------|
|                |                                                            | Ang II7D    | Ang II28D  | TAC 28D    |
| Aebp1          | <b>AE binding protein 1</b>                                | 2.3         |            |            |
| Arid5a*        | AT rich interactive domain 5A                              | 2.7         | 2.5        |            |
| Arnt2          | Aryl hydrocarbon receptor nuclear translocator 2           |             | 2.5        |            |
|                | <b>Aryl hydrocarbon receptor nuclear translocator-like</b> |             |            |            |
| <b>Arntl*†</b> | <b>translocator-like</b>                                   | <b>16.8</b> | <b>8.5</b> | <b>4.9</b> |
| <b>Atf3*†</b>  | <b>Activating transcription factor 3</b>                   | <b>3.3</b>  | <b>5.5</b> | <b>2.1</b> |
|                | <b>Basic leucine zipper transcription factor, ATF-like</b> |             |            |            |
| Batf           | <b>like</b>                                                | 3.9         |            |            |
| Bcl11a*        | B-cell CLL-lymphoma 11A                                    | 2.6         | 2.3        |            |
| Bhlhe40        | basic helix-loop-helix family, member e40                  |             |            | 2.0        |
| Bnc1           | basonuclin-1                                               | 0.2         |            |            |
| Cebpd*         | CCAAT-enhancer binding protein delta                       | 2.1         | 2.4        |            |
| Clock          | circadian locomotor output cycles kaput                    |             |            | 1.5        |
| Creb3l1*       | cAMP responsive element binding protein 3-like 1           | 2.9         | 2.2        |            |
| Creb3l3        | cAMP responsive element binding protein 3-like 3           |             |            | 2.8        |
| Crem           | cAMP responsive element modulator                          |             |            | 1.8        |
| Csrnp3         | Cysteine And Serine Rich Nuclear Protein 3                 | 0.4         |            |            |
| <b>Dbp*†</b>   | <b>D site albumin promoter binding protein</b>             | <b>0.0</b>  | <b>0.3</b> | <b>0.5</b> |
| E2f1           | E2F transcription factor 1                                 | 4.3         | 0.4        | 1.6        |
| E2f2*          | E2F transcription factor 2                                 | 6.6         | 2.2        |            |
| Egr1           | Early growth response 1                                    |             | 4.4        |            |
| Egr2*          | Early growth response 2                                    | 7.6         | 6.4        |            |
| Etv4           | Ets Variant Gene 4                                         | 6.9         |            |            |
|                | <b>FBJ murine osteosarcoma viral oncogene homolog B</b>    |             |            |            |
| Fosb*          | <b>B</b>                                                   | 6.8         | 4.0        |            |
| Foxd3          | Forkhead Box D3                                            | 0.3         |            |            |
| Foxm1          | Forkhead Box M1                                            | 8.9         |            |            |
| Foxo6          | forkhead box O6                                            |             |            | 0.5        |
| <b>Foxs1*†</b> | <b>Forkhead box S1</b>                                     | <b>3.4</b>  | <b>2.8</b> | <b>1.7</b> |
| Fus            | fused in sarcoma                                           |             |            | 0.5        |
| Gata3          | GATA binding protein 3                                     | 0.3         |            |            |
| Gata5          | GATA binding protein 5                                     |             | 3.0        |            |
| Grhl2*         | Grainyhead-like 2                                          | 0.2         | 0.3        |            |
| Hic1           | hypermethylated in cancer 1                                |             |            | 1.9        |
| Hif3a          | Hypoxia Inducible Factor 3 Alpha Subunit                   | 0.4         |            |            |
| <b>Hlf*†</b>   | <b>Hepatic leukemia factor</b>                             | <b>0.2</b>  | <b>0.3</b> | <b>0.4</b> |
| Hoxa4          | Homeo box A4                                               |             | 0.4        |            |

|                |                                                     |            |            |            |
|----------------|-----------------------------------------------------|------------|------------|------------|
| Hoxb9          | homeobox B9                                         |            |            | 2.1        |
| Hoxd9*         | Homeobox D9                                         | 2.5        | 2.5        |            |
| Hspa1a*        | Heat shock protein 1A                               | 2.4        | 2.5        |            |
| Id2            | inhibitor of DNA binding 2                          |            |            | 1.7        |
| Id4            | Inhibitor Of DNA Binding 4                          | 2.5        |            |            |
| Ikzf1          | IKAROS family zinc finger 1                         | 2.2        |            |            |
| Ikzf3*         | IKAROS family zinc finger 3                         | 3.8        | 2.7        |            |
| Ikzf4*         | IKAROS family zinc finger 4                         | 2.4        | 2.4        |            |
| Irf4           | Interferon regulatory factor 4                      | 0.4        |            |            |
| Irf7           | Interferon regulatory factor 7                      |            | 0.4        |            |
| Junb           | Jun-B oncogene                                      |            |            | 1.7        |
|                | Potassium Voltage-Gated Channel Interacting         |            |            |            |
| Kcnip3         | Protein 3                                           | 0.4        |            |            |
| Klf15          | Kruppel-like factor 15                              |            |            | 0.7        |
| Klf5           | Kruppel-Like Factor 5                               |            | 2.2        |            |
| Ldb2           | LIM Domain Binding 2                                | 2.5        |            |            |
| Lhx2           | LIM homeobox protein 2                              |            |            | 3.3        |
| Litaf          | Lipopolysaccharide Induced TNF Factor               | 2.5        |            | 1.7        |
|                | v-maf musculoaponeurotic fibrosarcoma oncogene      |            |            |            |
| Maff           | family, protein F (avian)                           |            |            | 1.6        |
| Meox1*         | Mesenchyme homeobox 1                               | 5.5        | 2.6        |            |
|                | myeloid/lymphoid or mixed-lineage leukemia          |            |            |            |
| Mllt3          | (trithorax homolog, Drosophila); translocated to, 3 |            |            | 0.5        |
| Mybl1          | MYB Proto-Oncogene Like 1                           | 2.5        |            |            |
| Myc*           | V-myc myelocytomatosis viral oncogene homolog       | 2.7        | 2.1        |            |
|                | v-myc myelocytomatosis viral oncogene homolog       |            |            |            |
| Mycl1*         | 1 lung carcinoma derived                            | 5.2        | 4.3        |            |
|                | v-myc myelocytomatosis viral related oncogene,      |            |            |            |
| Mycn           | neuroblastoma derived (avian)                       |            |            | 1.6        |
| Neurog3        | neurogenin 3                                        |            |            | 0.2        |
|                | nuclear factor of activated T cells, cytoplasmic,   |            |            |            |
| Nfatc4         | calcineurin dependent 4                             |            |            | 1.7        |
| Nfe2l3         | Nuclear Factor, Erythroid 2 Like 3                  | 3.2        |            |            |
| Nov            | Nephroblastoma Overexpressed                        | 2.1        |            |            |
| <b>Npas2*†</b> | <b>Neuronal PAS domain protein 2</b>                | <b>4.8</b> | <b>3.0</b> | <b>1.8</b> |
|                | <b>Nuclear receptor subfamily 1 group D member</b>  |            |            |            |
| <b>Nr1d2*†</b> | <b>2</b>                                            | <b>0.2</b> | <b>0.4</b> | <b>0.6</b> |
| Nrl            | neural retina leucine zipper gene                   |            |            | 2.0        |
| Pbx2           | pre B cell leukemia homeobox 2                      |            |            | 2.0        |
| Scx            | scleraxis                                           |            |            | 1.6        |
| Msx2           | Msh homeobox 2                                      |            | 2.0        |            |
| Smad7          | SMAD family member 7                                |            |            | 1.8        |
| Snai3          | snail homolog 3 (Drosophila)                        |            |            | 0.4        |
| Sox18          | SRY-box containing gene 18                          |            |            | 1.5        |

|         |                                                     |     |
|---------|-----------------------------------------------------|-----|
| Sox4    | SRY-box containing gene 4                           | 0.6 |
| Sox9    | SRY-box containing gene 9                           | 2.0 |
| Srebf2  | sterol regulatory element binding factor 2          | 1.9 |
| Stat5a  | signal transducer and activator of transcription 5A | 0.5 |
| Tbx15   | T-box 15                                            | 3.2 |
| Tef     | thyrotroph embryonic factor                         | 0.5 |
| Trim33  | tripartite motif-containing 33                      | 0.5 |
| Tsc22d3 | TSC22 domain family, member 3                       | 0.7 |
| Zbtb12  | zinc finger and BTB domain containing 12            | 0.5 |
| Zfp488  | zinc finger protein 488                             | 1.7 |

---

Asterisk (\*) indicates 22 TFs continually changing during Ang II infusion for 7 and 28 days. Dagger sign (†) indicates 7 TFs with common alteration during Ang II infusion and TAC for 28 days.

**Supplemental Table 2: Differential expression genes between WT and ATF3KO****CF**

| <b>Gene ID</b> | <b>Gene Symbol</b> | <b>FDR</b> | <b>Fold change of<br/>ATF3 KO vs WT</b> | <b>Up-Down</b> |
|----------------|--------------------|------------|-----------------------------------------|----------------|
| 58520          | 0610007P14Rik      | 0.000      | 1.45                                    | UP             |
| 67851          | 1700021F05Rik      | 0.024      | 0.67                                    | Down           |
| 75623          | 1700029F09Rik      | 0.027      | 0.59                                    | Down           |
| 76669          | 1700128F08Rik      | 0.029      | 1258.92                                 | UP             |
| 69126          | 1810022K09Rik      | 0.001      | 0.68                                    | Down           |
| 70153          | 2210016F16Rik      | 0.010      | 0.75                                    | Down           |
| 68544          | 2310036O22Rik      | 0.035      | 0.82                                    | Down           |
| 69612          | 2310037I24Rik      | 0.009      | 0.81                                    | Down           |
| 71923          | 2310047M10Rik      | 0.011      | 1.62                                    | UP             |
| 78890          | 2310079F23Rik      | 0.034      | 1.80                                    | UP             |
| 72128          | 2610008E11Rik      | 0.009      | 0.68                                    | Down           |
| 67683          | 2610029G23Rik      | 0.048      | 0.81                                    | Down           |
| 66578          | 2610039C10Rik      | 0.038      | 0.58                                    | Down           |
| 112422         | 2610305D13Rik      | 0.032      | 1.65                                    | UP             |
| 78832          | 2700078E11Rik      | 0.014      | 0.79                                    | Down           |
| 68026          | 2810417H13Rik      | 0.000      | 0.71                                    | Down           |
| 73112          | 3110003A17Rik      | 0.007      | 0.77                                    | Down           |
| 66680          | 3230401D17Rik      | 0.025      | 0.74                                    | Down           |
| 74041          | 4632434I11Rik      | 0.001      | 0.67                                    | Down           |
| 223989         | 4921513D23Rik      | 0.008      | 1.32                                    | UP             |
| 68271          | 4930441O14Rik      | 0.016      | 540.60                                  | UP             |
| 75939          | 4930579G24Rik      | 0.000      | 0.45                                    | Down           |
| 233103         | 4931406P16Rik      | 0.000      | 1.32                                    | UP             |
| 229227         | 4932438A13Rik      | 0.001      | 1.32                                    | UP             |
| 71101          | 4933407H18Rik      | 0.000      | 1.71                                    | UP             |
| 238330         | 6430527G18Rik      | 0.000      | 1.34                                    | UP             |
| 231014         | 9330182L06Rik      | 0.040      | 10.78                                   | UP             |
| 240185         | 9430020K01Rik      | 0.000      | 1.27                                    | UP             |
| 319277         | A230046K03Rik      | 0.008      | 1.25                                    | UP             |
| 319278         | A230050P20Rik      | 0.024      | 1.44                                    | UP             |
| 269855         | A430110N23Rik      | 0.002      | 1.34                                    | UP             |
| 239559         | A4galt             | 0.003      | 1.88                                    | UP             |
| 213993         | A630007B06Rik      | 0.037      | 1.41                                    | UP             |
| 77128          | A930001N09Rik      | 0.049      | 1.36                                    | UP             |
| 223921         | Aaas               | 0.036      | 0.81                                    | Down           |
| 268860         | Abat               | 0.002      | 1.66                                    | UP             |
| 11303          | Abca1              | 0.028      | 1.20                                    | UP             |
| 27403          | Abca7              | 0.002      | 1.43                                    | UP             |
| 217262         | Abca9              | 0.003      | 1.34                                    | UP             |

|        |          |       |      |      |
|--------|----------|-------|------|------|
| 27416  | Abcc5    | 0.007 | 1.31 | UP   |
| 76491  | Abhd14b  | 0.027 | 1.35 | UP   |
| 320712 | Abi3bp   | 0.000 | 1.40 | UP   |
| 107476 | Acaca    | 0.000 | 1.29 | UP   |
| 110460 | Acat2    | 0.000 | 1.72 | UP   |
| 11421  | Ace      | 0.000 | 1.73 | UP   |
| 104112 | Acly     | 0.000 | 1.58 | UP   |
| 70025  | Acot7    | 0.013 | 0.82 | Down |
| 74205  | Acs13    | 0.000 | 1.40 | UP   |
| 60525  | Acss2    | 0.000 | 2.48 | UP   |
| 11475  | Acta2    | 0.000 | 0.72 | Down |
| 11461  | Actb     | 0.000 | 0.79 | Down |
| 11489  | Adam12   | 0.000 | 1.25 | UP   |
| 224697 | Adamts10 | 0.000 | 1.49 | UP   |
| 239337 | Adamts12 | 0.003 | 1.58 | UP   |
| 240913 | Adamts4  | 0.000 | 1.77 | UP   |
| 108153 | Adamts7  | 0.000 | 1.41 | UP   |
| 269959 | Adamts13 | 0.000 | 1.25 | UP   |
| 110532 | Adarb1   | 0.021 | 1.34 | UP   |
| 242669 | Adc      | 0.025 | 1.48 | UP   |
| 76187  | Adhfe1   | 0.006 | 1.77 | UP   |
| 70292  | Afap1    | 0.018 | 1.27 | UP   |
| 106877 | Afap111  | 0.003 | 1.91 | UP   |
| 93736  | Aff4     | 0.000 | 1.21 | UP   |
| 231801 | Agfg2    | 0.004 | 1.35 | UP   |
| 11603  | Agrn     | 0.007 | 1.34 | UP   |
| 226691 | AI607873 | 0.001 | 1.38 | UP   |
| 433693 | Akirin2  | 0.026 | 0.79 | Down |
| 19378  | Aldh1a2  | 0.000 | 1.30 | UP   |
| 107747 | Aldh111  | 0.000 | 1.49 | UP   |
| 11670  | Aldh3a1  | 0.020 | 1.36 | UP   |
| 212647 | Aldh4a1  | 0.008 | 1.47 | UP   |
| 71481  | Alpk1    | 0.004 | 1.66 | UP   |
| 52206  | Anapc4   | 0.001 | 0.81 | Down |
| 11601  | Angpt2   | 0.000 | 1.56 | UP   |
| 108857 | Ankhd1   | 0.002 | 1.25 | UP   |
| 107765 | Ankrd1   | 0.000 | 0.68 | Down |
| 99696  | Ankrd50  | 0.027 | 0.81 | Down |
| 77318  | Ankrd55  | 0.001 | 1.60 | UP   |
| 67628  | Anp32b   | 0.000 | 0.81 | Down |
| 16790  | Anpep    | 0.015 | 1.22 | UP   |
| 16952  | Anxa1    | 0.000 | 0.72 | Down |
| 319924 | Apba1    | 0.005 | 1.41 | UP   |
| 11789  | Apc      | 0.000 | 1.28 | UP   |



|           |           |       |      |      |
|-----------|-----------|-------|------|------|
| 11800     | Api5      | 0.000 | 0.78 | Down |
| 30878     | Apln      | 0.000 | 1.65 | UP   |
| 11816     | Apoe      | 0.000 | 1.28 | UP   |
| 68316     | Apoo      | 0.001 | 0.42 | Down |
| 106952    | Arap3     | 0.023 | 1.63 | UP   |
| 234023    | Arglu1    | 0.048 | 0.81 | Down |
| 228482    | Arhgap11a | 0.001 | 0.71 | Down |
| 58996     | Arhgap23  | 0.005 | 1.21 | UP   |
| 233071    | Arhgap33  | 0.022 | 2.52 | UP   |
| 52666     | Arhgef25  | 0.010 | 1.28 | UP   |
| 239985    | Arid1b    | 0.027 | 1.21 | UP   |
| 65105     | Arl6ip4   | 0.003 | 0.71 | Down |
| 65106     | Arl6ip5   | 0.019 | 0.83 | Down |
| 56443     | Arpc1a    | 0.014 | 0.80 | Down |
| 109689    | Arrb1     | 0.011 | 1.30 | UP   |
| 105171    | Arrdc3    | 0.020 | 1.44 | UP   |
| 11883     | Arsa      | 0.000 | 1.39 | UP   |
| 11881     | Arsb      | 0.011 | 1.24 | UP   |
| 230837    | Asap3     | 0.000 | 1.64 | UP   |
| 70396     | Asnsd1    | 0.010 | 0.77 | Down |
| 66695     | Aspn      | 0.005 | 1.45 | UP   |
| 108888    | Atad3a    | 0.040 | 0.75 | Down |
| 11910     | Atf3      | 0.000 | 0.00 | Down |
| 223922    | Atf7      | 0.049 | 1.70 | UP   |
| 76295     | Atp11b    | 0.024 | 1.31 | UP   |
| 67126     | Atp5e     | 0.033 | 0.73 | Down |
| 228033    | Atp5g3    | 0.012 | 0.82 | Down |
| 71679     | Atp5h     | 0.023 | 0.83 | Down |
| 108664    | Atp6v1h   | 0.006 | 0.81 | Down |
| 11977     | Atp7a     | 0.009 | 1.36 | UP   |
| 11983     | Atpif1    | 0.037 | 0.83 | Down |
| 226255    | Atrnl1    | 0.016 | 1.26 | UP   |
| 22589     | Atrx      | 0.000 | 1.37 | UP   |
| 20877     | Aurkb     | 0.024 | 0.78 | Down |
| 23821     | Bace1     | 0.004 | 1.24 | UP   |
| 56175     | Bace2     | 0.048 | 1.67 | UP   |
| 12013     | Bach1     | 0.000 | 1.50 | UP   |
| 228536    | Bahd1     | 0.017 | 1.41 | UP   |
| 104416    | Bap1      | 0.040 | 1.23 | UP   |
| 70508     | Bbx       | 0.006 | 1.29 | UP   |
| 229003    | BC006779  | 0.000 | 1.35 | UP   |
| 217216    | BC030867  | 0.003 | 0.56 | Down |
| 100568459 | Bc1       | 0.012 | 2.20 | UP   |
| 68183     | Bcas2     | 0.004 | 0.71 | Down |

|        |               |       |      |      |
|--------|---------------|-------|------|------|
| 12048  | Bcl2l1        | 0.000 | 0.78 | Down |
| 12029  | Bcl6b         | 0.000 | 2.55 | UP   |
| 77578  | Bcl9          | 0.033 | 1.38 | UP   |
| 20893  | Bhlhe40       | 0.000 | 1.44 | UP   |
| 83675  | Bicc1         | 0.000 | 1.25 | UP   |
| 11799  | Birc5         | 0.005 | 0.75 | Down |
| 12211  | Birc6         | 0.001 | 1.21 | UP   |
| 233016 | Blvrb         | 0.000 | 0.73 | Down |
| 12159  | Bmp4          | 0.015 | 0.74 | Down |
| 12168  | Bmpr2         | 0.005 | 1.50 | UP   |
| 12190  | Brca2         | 0.025 | 0.68 | Down |
| 70456  | Brp44         | 0.002 | 0.60 | Down |
| 74007  | Btbd11        | 0.040 | 0.53 | Down |
| 238386 | Btbd7         | 0.000 | 1.61 | UP   |
| 226089 | C030046E11Rik | 0.040 | 1.31 | UP   |
| 226777 | C130074G19Rik | 0.021 | 2.04 | UP   |
| 12261  | C1qbp         | 0.001 | 0.82 | Down |
| 56745  | C1qtnf1       | 0.004 | 1.39 | UP   |
| 72709  | C1qtnf6       | 0.000 | 1.33 | UP   |
| 232371 | C1rl          | 0.002 | 1.54 | UP   |
| 50908  | C1s           | 0.000 | 1.76 | UP   |
| 12266  | C3            | 0.000 | 1.48 | UP   |
| 12268  | C4b           | 0.002 | 1.37 | UP   |
| 12301  | Cacybp        | 0.021 | 0.82 | Down |
| 67488  | Calcoco1      | 0.002 | 1.38 | UP   |
| 12314  | Calm2         | 0.000 | 0.82 | Down |
| 55984  | Camkk1        | 0.023 | 2.01 | UP   |
| 216874 | Camta2        | 0.041 | 1.25 | UP   |
| 12334  | Capn2         | 0.000 | 0.82 | Down |
| 12371  | Casp9         | 0.029 | 1.36 | UP   |
| 12391  | Cav3          | 0.016 | 0.57 | Down |
| 12402  | Cbl           | 0.042 | 1.54 | UP   |
| 109857 | Cbr3          | 0.005 | 0.67 | Down |
| 12417  | Cbx3          | 0.000 | 0.78 | Down |
| 68339  | Ccdc88c       | 0.011 | 4.53 | UP   |
| 12424  | Cck           | 0.019 | 0.08 | Down |
| 20292  | Ccl11         | 0.026 | 1.46 | UP   |
| 20305  | Ccl6          | 0.024 | 1.77 | UP   |
| 20307  | Ccl8          | 0.000 | 1.82 | UP   |
| 20308  | Ccl9          | 0.000 | 1.55 | UP   |
| 12428  | Ccna2         | 0.001 | 0.81 | Down |
| 268697 | Ccnb1         | 0.018 | 0.82 | Down |
| 12443  | Ccnd1         | 0.000 | 0.62 | Down |
| 12444  | Ccnd2         | 0.000 | 0.82 | Down |

|        |          |       |       |      |
|--------|----------|-------|-------|------|
| 12449  | Ccnf     | 0.014 | 0.72  | Down |
| 227210 | Ccnyl1   | 0.012 | 0.83  | Down |
| 12466  | Cct6a    | 0.000 | 0.82  | Down |
| 17079  | Cd180    | 0.029 | 0.28  | Down |
| 70445  | Cd248    | 0.015 | 0.82  | Down |
| 60533  | Cd274    | 0.016 | 2.94  | UP   |
| 70333  | Cd3eap   | 0.013 | 0.71  | Down |
| 12505  | Cd44     | 0.000 | 0.79  | Down |
| 17064  | Cd93     | 0.000 | 1.89  | UP   |
| 216150 | Cdc34    | 0.001 | 0.77  | Down |
| 104252 | Cdc42ep2 | 0.001 | 0.71  | Down |
| 12544  | Cdc45    | 0.008 | 0.68  | Down |
| 52276  | Cdca8    | 0.000 | 0.67  | Down |
| 12554  | Cdh13    | 0.001 | 1.91  | UP   |
| 12560  | Cdh3     | 0.015 | 0.36  | Down |
| 12562  | Cdh5     | 0.000 | 2.34  | UP   |
| 12534  | Cdk1     | 0.000 | 0.75  | Down |
| 107951 | Cdk9     | 0.022 | 0.80  | Down |
| 227526 | Cdnf     | 0.015 | 12.94 | UP   |
| 57810  | Cdon     | 0.000 | 1.33  | UP   |
| 60411  | Cenpk    | 0.005 | 0.50  | Down |
| 70454  | Cenpl    | 0.008 | 0.52  | Down |
| 74107  | Cep55    | 0.037 | 0.78  | Down |
| 28135  | Cep63    | 0.006 | 0.63  | Down |
| 14962  | Cfb      | 0.000 | 1.47  | UP   |
| 12628  | Cfh      | 0.000 | 1.29  | UP   |
| 12630  | Cfi      | 0.032 | 1.87  | UP   |
| 18636  | Cfp      | 0.037 | 2.80  | UP   |
| 27221  | Chaf1a   | 0.001 | 0.73  | Down |
| 110749 | Chaf1b   | 0.000 | 0.57  | Down |
| 66121  | Chchd1   | 0.035 | 0.72  | Down |
| 14004  | Chchd2   | 0.039 | 0.78  | Down |
| 72170  | Chchd4   | 0.004 | 0.47  | Down |
| 244059 | Chd2     | 0.001 | 1.40  | UP   |
| 71389  | Chd6     | 0.008 | 1.31  | UP   |
| 109151 | Chd9     | 0.001 | 1.42  | UP   |
| 218865 | Chdh     | 0.003 | 5.18  | UP   |
| 12662  | Chm      | 0.015 | 1.34  | UP   |
| 76969  | Chst1    | 0.001 | 2.02  | UP   |
| 71722  | Cic      | 0.000 | 1.45  | UP   |
| 68379  | Ciz1     | 0.007 | 1.27  | UP   |
| 54124  | Cks1b    | 0.001 | 0.71  | Down |
| 66197  | Cks2     | 0.001 | 0.69  | Down |
| 26373  | Clcn7    | 0.001 | 1.30  | UP   |

|        |               |       |      |      |
|--------|---------------|-------|------|------|
| 60363  | Cldn15        | 0.013 | 1.33 | UP   |
| 12741  | Cldn5         | 0.002 | 2.01 | UP   |
| 224796 | Clic5         | 0.033 | 3.59 | UP   |
| 78785  | Clip4         | 0.001 | 2.25 | UP   |
| 12759  | Clu           | 0.000 | 1.63 | UP   |
| 12785  | Cnbp          | 0.000 | 0.73 | Down |
| 12798  | Cnn2          | 0.000 | 0.80 | Down |
| 12818  | Col14a1       | 0.000 | 1.29 | UP   |
| 12822  | Col18a1       | 0.000 | 1.56 | UP   |
| 373864 | Col27a1       | 0.007 | 1.89 | UP   |
| 12825  | Col3a1        | 0.000 | 1.28 | UP   |
| 12833  | Col6a1        | 0.000 | 1.23 | UP   |
| 17846  | Commd1        | 0.006 | 0.68 | Down |
| 12866  | Cox7a2        | 0.002 | 0.76 | Down |
| 66142  | Cox7b         | 0.000 | 0.73 | Down |
| 12870  | Cp            | 0.000 | 1.28 | UP   |
| 12876  | Cpe           | 0.000 | 0.79 | Down |
| 223978 | Cpped1        | 0.009 | 0.76 | Down |
| 56264  | Cpxm1         | 0.000 | 1.28 | UP   |
| 68337  | Crip2         | 0.000 | 0.80 | Down |
| 12931  | Crlf1         | 0.000 | 0.75 | Down |
| 12933  | Crmp1         | 0.001 | 2.88 | UP   |
| 110750 | Cse1l         | 0.002 | 0.83 | Down |
| 12977  | Csf1          | 0.000 | 0.80 | Down |
| 12978  | Csf1r         | 0.043 | 0.61 | Down |
| 12982  | Csf2ra        | 0.002 | 2.22 | UP   |
| 73720  | Cst6          | 0.033 | 0.43 | Down |
| 14219  | Ctgf          | 0.000 | 0.83 | Down |
| 68588  | Cthrc1        | 0.020 | 1.58 | UP   |
| 66965  | Ctu2          | 0.047 | 0.70 | Down |
| 15945  | Cxcl10        | 0.000 | 9.35 | UP   |
| 20315  | Cxcl12        | 0.000 | 1.32 | UP   |
| 57266  | Cxcl14        | 0.006 | 0.76 | Down |
| 12767  | Cxcr4         | 0.000 | 2.32 | UP   |
| 12778  | Cxcr7         | 0.017 | 1.31 | UP   |
| 13063  | Cycs          | 0.006 | 0.82 | Down |
| 114886 | Cygb          | 0.000 | 1.39 | UP   |
| 13121  | Cyp51         | 0.000 | 1.37 | UP   |
| 225995 | D030056L22Rik | 0.025 | 0.64 | Down |
| 66039  | D14Ert449e    | 0.000 | 2.53 | UP   |
| 27981  | D4Wsu53e      | 0.000 | 1.33 | UP   |
| 13134  | Dach1         | 0.010 | 8.09 | UP   |
| 59036  | Dact1         | 0.005 | 1.29 | UP   |
| 13138  | Dag1          | 0.000 | 1.31 | UP   |

|        |         |       |      |      |
|--------|---------|-------|------|------|
| 69635  | Dapk1   | 0.000 | 1.43 | UP   |
| 13143  | Dapk2   | 0.036 | 3.10 | UP   |
| 27214  | Dbf4    | 0.005 | 0.76 | Down |
| 83703  | Dbr1    | 0.021 | 0.66 | Down |
| 76863  | Dcun1d5 | 0.011 | 0.80 | Down |
| 69219  | Ddah1   | 0.000 | 0.81 | Down |
| 66942  | Ddx18   | 0.017 | 0.81 | Down |
| 228889 | Ddx27   | 0.021 | 0.79 | Down |
| 68278  | Ddx39   | 0.022 | 0.82 | Down |
| 230073 | Ddx58   | 0.000 | 1.22 | UP   |
| 234311 | Ddx60   | 0.001 | 2.57 | UP   |
| 110052 | Dek     | 0.000 | 0.73 | Down |
| 329727 | Dennd2c | 0.049 | 0.46 | Down |
| 68184  | Denr    | 0.010 | 0.79 | Down |
| 74754  | Dhcr24  | 0.000 | 1.56 | UP   |
| 13360  | Dhcr7   | 0.000 | 1.73 | UP   |
| 13361  | Dhfr    | 0.002 | 0.66 | Down |
| 20148  | Dhrs3   | 0.000 | 1.46 | UP   |
| 54004  | Diap2   | 0.025 | 1.34 | UP   |
| 56419  | Diap3   | 0.027 | 0.80 | Down |
| 66254  | Dimt1   | 0.004 | 0.58 | Down |
| 72662  | Dis3    | 0.048 | 0.80 | Down |
| 54485  | Dll4    | 0.003 | 2.32 | UP   |
| 240283 | Dmxl1   | 0.007 | 1.38 | UP   |
| 22791  | Dnajc2  | 0.000 | 0.68 | Down |
| 246738 | Dnajc28 | 0.010 | 4.13 | UP   |
| 108671 | Dnajc9  | 0.001 | 0.70 | Down |
| 474332 | Dnm3os  | 0.000 | 1.97 | UP   |
| 13433  | Dnmt1   | 0.000 | 0.82 | Down |
| 238130 | Dock4   | 0.002 | 1.64 | UP   |
| 105445 | Dock9   | 0.000 | 1.94 | UP   |
| 83768  | Dpp7    | 0.015 | 1.29 | UP   |
| 13495  | Drg2    | 0.039 | 0.81 | Down |
| 13518  | Dst     | 0.000 | 1.24 | UP   |
| 80904  | Dtx3    | 0.037 | 1.35 | UP   |
| 209200 | Dtx3l   | 0.000 | 1.50 | UP   |
| 19252  | Dusp1   | 0.000 | 1.28 | UP   |
| 110074 | Dut     | 0.016 | 0.74 | Down |
| 13543  | Dvl2    | 0.030 | 1.24 | UP   |
| 13544  | Dvl3    | 0.001 | 1.45 | UP   |
| 21648  | Dynlt1b | 0.040 | 0.47 | Down |
| 13549  | Dyrk1b  | 0.005 | 1.56 | UP   |
| 228598 | Ebf4    | 0.018 | 5.75 | UP   |
| 68545  | Ecscr   | 0.038 | 1.24 | UP   |

|        |          |       |      |      |
|--------|----------|-------|------|------|
| 66967  | Edem3    | 0.000 | 1.27 | UP   |
| 13614  | Edn1     | 0.001 | 1.33 | UP   |
| 55949  | Eef1b2   | 0.000 | 0.82 | Down |
| 65967  | Eefsec   | 0.018 | 0.71 | Down |
| 13641  | Efnb1    | 0.024 | 0.75 | Down |
| 13644  | Efs      | 0.008 | 1.50 | UP   |
| 13649  | Egfr     | 0.000 | 1.29 | UP   |
| 13653  | Egr1     | 0.000 | 1.27 | UP   |
| 13654  | Egr2     | 0.036 | 1.31 | UP   |
| 20918  | Eif1     | 0.000 | 0.80 | Down |
| 13664  | Eif1a    | 0.001 | 0.82 | Down |
| 66235  | Eif1ax   | 0.018 | 0.82 | Down |
| 209354 | Eif2b1   | 0.037 | 0.79 | Down |
| 13665  | Eif2s1   | 0.000 | 0.81 | Down |
| 67204  | Eif2s2   | 0.000 | 0.79 | Down |
| 78655  | Eif3j    | 0.001 | 0.79 | Down |
| 192170 | Eif4a3   | 0.002 | 0.80 | Down |
| 13684  | Eif4e    | 0.003 | 0.79 | Down |
| 13688  | Eif4ebp2 | 0.033 | 1.29 | UP   |
| 16418  | Eif6     | 0.006 | 0.80 | Down |
| 15568  | Elavl1   | 0.001 | 0.77 | Down |
| 13714  | Elk4     | 0.025 | 1.71 | UP   |
| 13717  | Eln      | 0.000 | 1.41 | UP   |
| 170439 | Elov16   | 0.000 | 1.48 | UP   |
| 170757 | Elt1     | 0.007 | 1.76 | UP   |
| 59308  | Emcn     | 0.019 | 1.45 | UP   |
| 13726  | Emd      | 0.008 | 0.76 | Down |
| 14791  | Emg1     | 0.023 | 0.74 | Down |
| 100952 | Emilin1  | 0.000 | 1.29 | UP   |
| 237711 | Eml6     | 0.037 | 2.80 | UP   |
| 13809  | Enpep    | 0.020 | 1.78 | UP   |
| 18605  | Enpp1    | 0.001 | 1.34 | UP   |
| 13819  | Epas1    | 0.000 | 1.39 | UP   |
| 13823  | Epb4.113 | 0.001 | 0.81 | Down |
| 13838  | Epha4    | 0.001 | 2.00 | UP   |
| 13841  | Epha7    | 0.005 | 1.49 | UP   |
| 77781  | Epm2aip1 | 0.019 | 1.28 | UP   |
| 13855  | Epn2     | 0.000 | 1.45 | UP   |
| 80898  | Erap1    | 0.001 | 1.32 | UP   |
| 236930 | Ercc61   | 0.003 | 0.66 | Down |
| 170942 | Erdr1    | 0.000 | 0.01 | Down |
| 13874  | Ereg     | 0.000 | 0.66 | Down |
| 13876  | Erg      | 0.000 | 2.66 | UP   |
| 13877  | Erh      | 0.006 | 0.81 | Down |

|        |         |       |      |      |
|--------|---------|-------|------|------|
| 69524  | Esam    | 0.001 | 1.94 | UP   |
| 13885  | Esd     | 0.000 | 0.73 | Down |
| 66580  | Esf1    | 0.002 | 0.75 | Down |
| 75320  | Etnk1   | 0.035 | 1.24 | UP   |
| 66362  | Exosc3  | 0.001 | 0.56 | Down |
| 16456  | F11r    | 0.002 | 1.83 | UP   |
| 76267  | Fads1   | 0.000 | 1.26 | UP   |
| 56473  | Fads2   | 0.000 | 1.60 | UP   |
| 66540  | Fam107b | 0.004 | 0.74 | Down |
| 107373 | Fam111a | 0.002 | 0.82 | Down |
| 71721  | Fam13c  | 0.020 | 1.24 | UP   |
| 109359 | Fam175b | 0.033 | 1.30 | UP   |
| 68659  | Fam198b | 0.000 | 0.83 | Down |
| 66140  | Fam33a  | 0.024 | 0.64 | Down |
| 320609 | Fam40b  | 0.028 | 1.86 | UP   |
| 212943 | Fam46a  | 0.000 | 1.45 | UP   |
| 76820  | Fam49a  | 0.013 | 1.41 | UP   |
| 69109  | Fam58b  | 0.019 | 0.56 | Down |
| 235461 | Fam63b  | 0.000 | 1.27 | UP   |
| 68099  | Fam92a  | 0.000 | 0.73 | Down |
| 14104  | Fasn    | 0.000 | 1.34 | UP   |
| 329628 | Fat4    | 0.007 | 1.46 | UP   |
| 14113  | Fbl     | 0.000 | 0.79 | Down |
| 14114  | Fbln1   | 0.000 | 1.35 | UP   |
| 72194  | Fbxl20  | 0.003 | 1.39 | UP   |
| 14137  | Fdft1   | 0.000 | 1.27 | UP   |
| 110196 | Fdps    | 0.000 | 1.31 | UP   |
| 14156  | Fen1    | 0.000 | 0.67 | Down |
| 232237 | Fgd5    | 0.024 | 1.65 | UP   |
| 64654  | Fgf23   | 0.012 | 2.05 | UP   |
| 14190  | Fgl2    | 0.011 | 1.39 | UP   |
| 14194  | Fhl     | 0.005 | 0.77 | Down |
| 229474 | Fhdc1   | 0.011 | 0.68 | Down |
| 14199  | Fhl1    | 0.000 | 0.72 | Down |
| 231997 | Fkbp14  | 0.009 | 1.27 | UP   |
| 30795  | Fkbp3   | 0.005 | 0.78 | Down |
| 14229  | Fkbp5   | 0.049 | 0.81 | Down |
| 55990  | Fmo2    | 0.017 | 1.59 | UP   |
| 68655  | Fndc1   | 0.000 | 1.36 | UP   |
| 319448 | Fndc3a  | 0.000 | 1.37 | UP   |
| 72007  | Fndc3b  | 0.000 | 1.25 | UP   |
| 14281  | Fos     | 0.000 | 1.38 | UP   |
| 14282  | Fosb    | 0.000 | 2.31 | UP   |
| 108655 | Foxp1   | 0.006 | 0.83 | Down |

|           |               |       |      |      |
|-----------|---------------|-------|------|------|
| 72313     | Fryl          | 0.018 | 1.27 | UP   |
| 14325     | Ftl1          | 0.000 | 0.80 | Down |
| 56095     | Ftsj3         | 0.000 | 0.73 | Down |
| 73068     | Fut11         | 0.044 | 1.29 | UP   |
| 56188     | Fxyd1         | 0.004 | 1.95 | UP   |
| 654820    | G530011O06Rik | 0.000 | 0.33 | Down |
| 14387     | Gaa           | 0.000 | 1.23 | UP   |
| 14388     | Gab1          | 0.021 | 1.26 | UP   |
| 102060    | Gadd45gip1    | 0.012 | 0.75 | Down |
| 74246     | Gale          | 0.020 | 1.46 | UP   |
| 68147     | Gar1          | 0.003 | 0.66 | Down |
| 14450     | Gart          | 0.017 | 0.79 | Down |
| 14451     | Gas1          | 0.000 | 1.50 | UP   |
| 14457     | Gas7          | 0.000 | 1.33 | UP   |
| 80909     | Gatsl2        | 0.023 | 1.45 | UP   |
| 55932     | Gbp3          | 0.007 | 1.31 | UP   |
| 229900    | Gbp7          | 0.011 | 1.43 | UP   |
| 236573    | Gbp9          | 0.026 | 1.70 | UP   |
| 72972     | Gcap14        | 0.001 | 1.29 | UP   |
| 26912     | Gcat          | 0.000 | 1.59 | UP   |
| 14630     | Gclm          | 0.000 | 0.68 | Down |
| 68133     | Gcsh          | 0.018 | 0.71 | Down |
| 14567     | Gdi1          | 0.004 | 1.26 | UP   |
| 67604     | Get4          | 0.022 | 0.78 | Down |
| 328232    | Gfod1         | 0.001 | 1.90 | UP   |
| 14585     | Gfra1         | 0.005 | 1.54 | UP   |
| 56316     | Ggcx          | 0.029 | 1.24 | UP   |
| 217039    | Ggnbp2        | 0.002 | 0.81 | Down |
| 23887     | Ggt5          | 0.007 | 1.76 | UP   |
| 272551    | Gins2         | 0.004 | 0.63 | Down |
| 109145    | Gins4         | 0.008 | 0.74 | Down |
| 109801    | Glo1          | 0.041 | 0.82 | Down |
| 73046     | Glrx5         | 0.024 | 0.76 | Down |
| 100036768 | Gm11696       | 0.019 | 0.08 | Down |
| 628308    | Gm14420       | 0.000 | 1.33 | UP   |
| 24083     | Gm16515       | 0.003 | 1.55 | UP   |
| 100463512 | Gm20594       | 0.033 | 1.37 | UP   |
| 14681     | Gnao1         | 0.007 | 1.32 | UP   |
| 230737    | Gnl2          | 0.043 | 0.81 | Down |
| 30877     | Gnl3          | 0.028 | 0.82 | Down |
| 54342     | Gnpnat1       | 0.036 | 0.76 | Down |
| 54214     | Golga4        | 0.000 | 1.29 | UP   |
| 224139    | Golgb1        | 0.000 | 1.33 | UP   |
| 14732     | Gpam          | 0.000 | 1.69 | UP   |



|        |          |       |       |      |
|--------|----------|-------|-------|------|
| 14571  | Gpd2     | 0.012 | 0.73  | Down |
| 14758  | Gpm6b    | 0.000 | 1.35  | UP   |
| 224792 | Gpr116   | 0.000 | 1.98  | UP   |
| 243277 | Gpr133   | 0.042 | 1.33  | UP   |
| 381413 | Gpr176   | 0.002 | 0.82  | Down |
| 106512 | Gpsm3    | 0.032 | 1.55  | UP   |
| 14778  | Gpx3     | 0.000 | 1.64  | UP   |
| 69590  | Gpx8     | 0.000 | 0.82  | Down |
| 14809  | Grik5    | 0.030 | 1.48  | UP   |
| 14810  | Grin1    | 0.005 | 3.77  | UP   |
| 54645  | Gripap1  | 0.046 | 1.34  | UP   |
| 56637  | Gsk3b    | 0.003 | 1.23  | UP   |
| 14873  | Gstol    | 0.000 | 0.76  | Down |
| 29870  | Gtse1    | 0.000 | 0.74  | Down |
| 60596  | Gucy1a3  | 0.001 | 1.31  | UP   |
| 54195  | Gucy1b3  | 0.007 | 1.33  | UP   |
| 74558  | Gvin1    | 0.000 | 1.41  | UP   |
| 14933  | Gyk      | 0.025 | 1.84  | UP   |
| 107435 | Hat1     | 0.000 | 0.67  | Down |
| 219072 | Haus4    | 0.001 | 0.61  | Down |
| 68695  | Hddc3    | 0.036 | 3.10  | UP   |
| 217026 | Heatr6   | 0.038 | 1.30  | UP   |
| 77446  | Heg1     | 0.000 | 1.26  | UP   |
| 15201  | Hells    | 0.002 | 0.68  | Down |
| 15204  | Herc2    | 0.001 | 1.23  | UP   |
| 226861 | Hhat     | 0.030 | 2.03  | UP   |
| 227095 | Hibch    | 0.032 | 0.69  | Down |
| 15251  | Hif1a    | 0.000 | 1.36  | UP   |
| 29816  | Hip1r    | 0.023 | 1.74  | UP   |
| 110521 | Hivep1   | 0.011 | 1.28  | UP   |
| 15361  | Hmga1    | 0.001 | 0.56  | Down |
| 15364  | Hmga2    | 0.017 | 0.61  | Down |
| 97165  | Hmgb2    | 0.000 | 0.74  | Down |
| 15357  | Hmgcr    | 0.000 | 1.51  | UP   |
| 208715 | Hmgcs1   | 0.000 | 1.44  | UP   |
| 15312  | Hmgn1    | 0.001 | 0.83  | Down |
| 15374  | Hn1      | 0.014 | 0.80  | Down |
| 15384  | Hnrnpab  | 0.000 | 0.79  | Down |
| 15439  | Hp       | 0.000 | 1.50  | UP   |
| 15458  | Hpx      | 0.040 | 10.78 | UP   |
| 15461  | Hras1    | 0.000 | 0.72  | Down |
| 58240  | Hs1bp3   | 0.047 | 1.28  | UP   |
| 15490  | Hsd17b7  | 0.000 | 1.71  | UP   |
| 15519  | Hsp90aa1 | 0.000 | 0.75  | Down |

|        |               |       |      |      |
|--------|---------------|-------|------|------|
| 50497  | Hspa14        | 0.021 | 0.79 | Down |
| 15482  | Hspa11        | 0.028 | 7.01 | UP   |
| 243912 | Hspb6         | 0.024 | 0.71 | Down |
| 29818  | Hspb7         | 0.039 | 0.76 | Down |
| 15510  | Hspd1         | 0.000 | 0.76 | Down |
| 15528  | Hspe1         | 0.000 | 0.73 | Down |
| 56213  | Htra1         | 0.008 | 1.24 | UP   |
| 78558  | Htra3         | 0.000 | 1.48 | UP   |
| 330723 | Htra4         | 0.049 | 0.62 | Down |
| 15194  | Htt           | 0.030 | 1.25 | UP   |
| 667370 | I830012O16Rik | 0.000 | 2.16 | UP   |
| 15926  | Idh1          | 0.000 | 1.25 | UP   |
| 319554 | Idi1          | 0.000 | 1.51 | UP   |
| 15932  | Idua          | 0.001 | 1.71 | UP   |
| 15936  | Ier2          | 0.005 | 1.21 | UP   |
| 15950  | Ifi203        | 0.000 | 1.66 | UP   |
| 71586  | Ifih1         | 0.047 | 1.23 | UP   |
| 15957  | Ifit1         | 0.000 | 1.68 | UP   |
| 15959  | Ifit3         | 0.000 | 1.52 | UP   |
| 15982  | Ifrd1         | 0.012 | 0.75 | Down |
| 16000  | Igf1          | 0.000 | 1.34 | UP   |
| 16009  | Igfbp3        | 0.000 | 1.40 | UP   |
| 16011  | Igfbp5        | 0.000 | 2.81 | UP   |
| 210094 | Iglon5        | 0.039 | 1.90 | UP   |
| 242050 | Igsf10        | 0.032 | 1.25 | UP   |
| 60440  | Igfp1         | 0.002 | 1.34 | UP   |
| 56489  | Ikbke         | 0.002 | 1.54 | UP   |
| 16186  | Il2rg         | 0.032 | 1.72 | UP   |
| 77125  | Il33          | 0.000 | 1.36 | UP   |
| 16195  | Il6st         | 0.000 | 1.29 | UP   |
| 67781  | Ilf2          | 0.031 | 0.83 | Down |
| 16210  | Impact        | 0.000 | 1.39 | UP   |
| 16319  | Incenp        | 0.001 | 0.79 | Down |
| 16323  | Inhba         | 0.001 | 0.71 | Down |
| 231070 | Insig1        | 0.000 | 1.47 | UP   |
| 404710 | Iqgap3        | 0.005 | 0.74 | Down |
| 16362  | Irf1          | 0.030 | 1.34 | UP   |
| 54123  | Irf7          | 0.000 | 1.48 | UP   |
| 54396  | Irgm2         | 0.006 | 1.29 | UP   |
| 71780  | Isyna1        | 0.000 | 1.57 | UP   |
| 109700 | Itga1         | 0.005 | 1.38 | UP   |
| 319480 | Itga11        | 0.013 | 1.36 | UP   |
| 16400  | Itga3         | 0.008 | 1.54 | UP   |
| 16403  | Itga6         | 0.007 | 1.82 | UP   |

|        |          |       |      |      |
|--------|----------|-------|------|------|
| 16414  | Itgb2    | 0.002 | 1.83 | UP   |
| 16416  | Itgb3    | 0.011 | 1.44 | UP   |
| 16419  | Itgb5    | 0.000 | 1.23 | UP   |
| 16425  | Itih2    | 0.003 | 1.45 | UP   |
| 320404 | Itpkb    | 0.006 | 1.41 | UP   |
| 20403  | Itsn2    | 0.000 | 1.45 | UP   |
| 231986 | Jazf1    | 0.028 | 0.55 | Down |
| 16476  | Jun      | 0.000 | 1.56 | UP   |
| 16477  | Junb     | 0.000 | 1.26 | UP   |
| 16478  | Jund     | 0.003 | 1.26 | UP   |
| 16480  | Jup      | 0.000 | 1.36 | UP   |
| 545156 | Kalrn    | 0.000 | 1.64 | UP   |
| 57814  | Kcne4    | 0.000 | 1.21 | UP   |
| 63830  | Kcnq1ot1 | 0.009 | 1.20 | UP   |
| 240776 | Kcnt2    | 0.038 | 1.45 | UP   |
| 622320 | Kctd21   | 0.036 | 1.83 | UP   |
| 105440 | Kctd9    | 0.000 | 0.69 | Down |
| 193796 | Kdm4b    | 0.001 | 1.44 | UP   |
| 16542  | Kdr      | 0.000 | 2.00 | UP   |
| 16551  | Kif11    | 0.002 | 0.78 | Down |
| 16554  | Kif13b   | 0.008 | 1.57 | UP   |
| 16560  | Kif1a    | 0.000 | 1.31 | UP   |
| 16565  | Kif21b   | 0.000 | 2.06 | UP   |
| 110033 | Kif22    | 0.034 | 0.81 | Down |
| 269152 | Kif26b   | 0.000 | 1.63 | UP   |
| 16573  | Kif5b    | 0.000 | 1.23 | UP   |
| 16590  | Kit      | 0.000 | 2.43 | UP   |
| 118445 | Klf16    | 0.017 | 0.70 | Down |
| 16598  | Klf2     | 0.004 | 1.42 | UP   |
| 16599  | Klf3     | 0.000 | 1.45 | UP   |
| 75785  | Klhl24   | 0.000 | 1.72 | UP   |
| 16669  | Krt19    | 0.041 | 0.20 | Down |
| 237339 | L3mbtl3  | 0.033 | 1.46 | UP   |
| 212442 | Lactb2   | 0.042 | 1.27 | UP   |
| 16776  | Lama5    | 0.005 | 1.51 | UP   |
| 16792  | Laptm5   | 0.008 | 3.64 | UP   |
| 214048 | Larp1b   | 0.033 | 0.68 | Down |
| 28036  | Larp7    | 0.000 | 0.70 | Down |
| 16803  | Lbp      | 0.000 | 1.88 | UP   |
| 16819  | Lcn2     | 0.001 | 1.33 | UP   |
| 18826  | Lcp1     | 0.025 | 1.76 | UP   |
| 16835  | Ldlr     | 0.000 | 1.24 | UP   |
| 232798 | Leng8    | 0.004 | 1.30 | UP   |
| 246316 | Lgi2     | 0.010 | 1.36 | UP   |

|        |        |       |      |      |
|--------|--------|-------|------|------|
| 19141  | Lgmn   | 0.000 | 1.37 | UP   |
| 16881  | Lig1   | 0.000 | 0.78 | Down |
| 14728  | Lilrb4 | 0.008 | 2.90 | UP   |
| 16890  | Lipe   | 0.035 | 1.56 | UP   |
| 16891  | Lipg   | 0.000 | 2.34 | UP   |
| 217325 | Llgl2  | 0.049 | 1.63 | UP   |
| 30937  | Lmcd1  | 0.036 | 0.80 | Down |
| 16905  | Lmna   | 0.000 | 0.83 | Down |
| 16906  | Lmnb1  | 0.000 | 0.76 | Down |
| 380928 | Lmo7   | 0.020 | 1.78 | UP   |
| 94352  | Loxl2  | 0.000 | 1.32 | UP   |
| 14792  | Lpcat3 | 0.002 | 1.25 | UP   |
| 14245  | Lpin1  | 0.000 | 1.96 | UP   |
| 16956  | Lpl    | 0.000 | 1.24 | UP   |
| 80877  | Lrba   | 0.024 | 1.46 | UP   |
| 16971  | Lrp1   | 0.000 | 1.20 | UP   |
| 231549 | Lrrc8d | 0.021 | 1.27 | UP   |
| 16987  | Lss    | 0.000 | 1.73 | UP   |
| 17022  | Lum    | 0.000 | 1.40 | UP   |
| 17101  | Lyst   | 0.002 | 1.36 | UP   |
| 17105  | Lyz2   | 0.011 | 1.50 | UP   |
| 17149  | Magoh  | 0.007 | 0.76 | Down |
| 67920  | Mak16  | 0.036 | 0.81 | Down |
| 26397  | Map2k3 | 0.000 | 2.09 | UP   |
| 225028 | Map4k3 | 0.014 | 1.21 | UP   |
| 328329 | Mast4  | 0.000 | 1.42 | UP   |
| 17181  | Matn2  | 0.000 | 1.35 | UP   |
| 84004  | Mcam   | 0.000 | 1.89 | UP   |
| 17216  | Mcm2   | 0.000 | 0.76 | Down |
| 17215  | Mcm3   | 0.000 | 0.79 | Down |
| 17217  | Mcm4   | 0.000 | 0.78 | Down |
| 17218  | Mcm5   | 0.000 | 0.67 | Down |
| 17219  | Mcm6   | 0.000 | 0.72 | Down |
| 17220  | Mcm7   | 0.000 | 0.78 | Down |
| 210711 | Mcmbp  | 0.005 | 0.81 | Down |
| 14013  | Mecom  | 0.010 | 1.30 | UP   |
| 17257  | Mecp2  | 0.002 | 1.36 | UP   |
| 76199  | Med13l | 0.010 | 1.26 | UP   |
| 69792  | Med6   | 0.029 | 1.50 | UP   |
| 80509  | Med8   | 0.041 | 0.79 | Down |
| 80889  | Mesdc1 | 0.047 | 0.80 | Down |
| 17294  | Mest   | 0.014 | 1.57 | UP   |
| 56307  | Metap2 | 0.000 | 0.80 | Down |
| 210029 | Metrl1 | 0.001 | 0.73 | Down |

|        |         |       |       |      |
|--------|---------|-------|-------|------|
| 76293  | Mfap4   | 0.000 | 1.63  | UP   |
| 50530  | Mfap5   | 0.000 | 0.74  | Down |
| 52065  | Mfhas1  | 0.013 | 0.75  | Down |
| 269181 | Mgat4a  | 0.003 | 1.78  | UP   |
| 320878 | Mical2  | 0.000 | 0.82  | Down |
| 17318  | Mid1    | 0.000 | 0.67  | Down |
| 67949  | Mki67ip | 0.003 | 0.73  | Down |
| 17347  | Mknk2   | 0.000 | 1.32  | UP   |
| 231051 | Mll3    | 0.044 | 1.30  | UP   |
| 17356  | Mllt4   | 0.000 | 1.32  | UP   |
| 246198 | Mllt6   | 0.000 | 1.34  | UP   |
| 77697  | Mmab    | 0.000 | 1.73  | UP   |
| 17380  | Mme     | 0.040 | 1.58  | UP   |
| 17388  | Mmp15   | 0.023 | 2.65  | UP   |
| 26561  | Mmp23   | 0.020 | 1.26  | UP   |
| 17394  | Mmp8    | 0.015 | 1.45  | UP   |
| 105450 | Mmrn2   | 0.000 | 1.64  | UP   |
| 17476  | Mpeg1   | 0.049 | 1.71  | UP   |
| 56282  | Mrpl12  | 0.038 | 0.80  | Down |
| 27397  | Mrpl17  | 0.004 | 0.79  | Down |
| 67681  | Mrpl18  | 0.000 | 0.71  | Down |
| 68611  | Mrpl28  | 0.025 | 0.75  | Down |
| 94062  | Mrpl3   | 0.002 | 0.72  | Down |
| 67270  | Mrpl42  | 0.035 | 0.78  | Down |
| 66407  | Mrps15  | 0.003 | 0.75  | Down |
| 69902  | Mrto4   | 0.000 | 0.58  | Down |
| 17688  | Msh6    | 0.000 | 0.69  | Down |
| 76626  | Msi2    | 0.032 | 1.26  | UP   |
| 17748  | Mt1     | 0.000 | 1.22  | UP   |
| 17750  | Mt2     | 0.000 | 1.21  | UP   |
| 66902  | Mtap    | 0.000 | 0.71  | Down |
| 17754  | Mtap1a  | 0.000 | 1.31  | UP   |
| 17760  | Mtap6   | 0.001 | 0.77  | Down |
| 238505 | Mtr     | 0.046 | 0.70  | Down |
| 17777  | Mttp    | 0.032 | 2.00  | UP   |
| 192156 | Mvd     | 0.000 | 1.90  | UP   |
| 17855  | Mvk     | 0.000 | 1.43  | UP   |
| 17857  | Mx1     | 0.002 | 17.25 | UP   |
| 56309  | Mycbp   | 0.017 | 0.57  | Down |
| 18109  | Mycn    | 0.035 | 0.57  | Down |
| 66915  | Myeov2  | 0.035 | 0.69  | Down |
| 98932  | MyI9    | 0.000 | 0.73  | Down |
| 107589 | Mylk    | 0.010 | 1.56  | UP   |
| 338367 | Myo1d   | 0.000 | 1.32  | UP   |

|        |         |       |       |      |
|--------|---------|-------|-------|------|
| 17920  | Myo6    | 0.021 | 1.33  | UP   |
| 17921  | Myo7a   | 0.002 | 1.25  | UP   |
| 270163 | Myo9a   | 0.049 | 1.21  | UP   |
| 54169  | Myst4   | 0.016 | 1.41  | UP   |
| 212706 | N4bp3   | 0.015 | 1.82  | UP   |
| 74838  | Naa15   | 0.000 | 0.72  | Down |
| 59027  | Nampt   | 0.000 | 1.27  | UP   |
| 94181  | Nans    | 0.029 | 0.83  | Down |
| 53605  | Nap111  | 0.000 | 0.79  | Down |
| 50927  | Nasp    | 0.000 | 0.69  | Down |
| 269198 | Nbeal1  | 0.020 | 1.46  | UP   |
| 17966  | Nbr1    | 0.000 | 1.29  | UP   |
| 52589  | Ncald   | 0.006 | 1.51  | UP   |
| 17970  | Ncf2    | 0.025 | 11.86 | UP   |
| 380969 | Nckap51 | 0.009 | 1.29  | UP   |
| 17977  | Ncoa1   | 0.002 | 1.36  | UP   |
| 14299  | Ncs1    | 0.000 | 0.69  | Down |
| 67052  | Ndc80   | 0.001 | 0.66  | Down |
| 17988  | Ndrp1   | 0.002 | 1.59  | UP   |
| 15531  | Ndst1   | 0.000 | 1.25  | UP   |
| 66706  | Ndufaf3 | 0.025 | 1.90  | UP   |
| 66218  | Ndufb9  | 0.045 | 0.80  | Down |
| 75406  | Ndufs7  | 0.012 | 0.74  | Down |
| 72900  | Ndufv2  | 0.012 | 0.82  | Down |
| 66961  | Neat1   | 0.000 | 1.85  | UP   |
| 234258 | Neil3   | 0.018 | 0.60  | Down |
| 66244  | Nemf    | 0.000 | 0.79  | Down |
| 18010  | Neu1    | 0.000 | 1.50  | UP   |
| 68810  | Nexn    | 0.037 | 0.76  | Down |
| 18023  | Nfe2l1  | 0.000 | 1.26  | UP   |
| 80859  | Nfkbiz  | 0.000 | 1.58  | UP   |
| 52530  | Nhp2    | 0.004 | 0.74  | Down |
| 18080  | Nin     | 0.015 | 1.29  | UP   |
| 18087  | Nktr    | 0.000 | 1.36  | UP   |
| 216856 | Nlgn2   | 0.000 | 1.37  | UP   |
| 18102  | Nme1    | 0.000 | 0.81  | Down |
| 57741  | Noc2l   | 0.000 | 0.76  | Down |
| 28126  | Nop16   | 0.000 | 0.58  | Down |
| 110109 | Nop2    | 0.000 | 0.69  | Down |
| 55989  | Nop58   | 0.000 | 0.71  | Down |
| 18127  | Nos3    | 0.003 | 2.03  | UP   |
| 18132  | Notch4  | 0.000 | 2.07  | UP   |
| 18148  | Npm1    | 0.000 | 0.83  | Down |
| 114249 | Npnt    | 0.049 | 0.75  | Down |

|        |         |       |        |      |
|--------|---------|-------|--------|------|
| 18160  | Npr1    | 0.029 | 1.72   | UP   |
| 18162  | Npr3    | 0.033 | 0.78   | Down |
| 18166  | Npy1r   | 0.043 | 2.88   | UP   |
| 223649 | Nrbp2   | 0.022 | 1.56   | UP   |
| 268903 | Nrip1   | 0.005 | 1.52   | UP   |
| 18187  | Nrp2    | 0.004 | 1.20   | UP   |
| 18193  | Nsd1    | 0.000 | 1.21   | UP   |
| 18194  | Nsdhl   | 0.000 | 1.56   | UP   |
| 67872  | Nsmce4a | 0.000 | 0.73   | Down |
| 70021  | Nt5dc2  | 0.040 | 0.81   | Down |
| 18208  | Ntn1    | 0.000 | 1.34   | UP   |
| 98415  | Nucks1  | 0.000 | 0.80   | Down |
| 18221  | Nudc    | 0.000 | 0.77   | Down |
| 66977  | Nuf2    | 0.005 | 0.78   | Down |
| 69482  | Nup35   | 0.001 | 0.65   | Down |
| 445007 | Nup85   | 0.000 | 0.66   | Down |
| 269966 | Nup98   | 0.000 | 1.32   | UP   |
| 108907 | Nusap1  | 0.000 | 0.62   | Down |
| 246728 | Oas2    | 0.008 | 1.65   | UP   |
| 231655 | Oasl1   | 0.013 | 1.78   | UP   |
| 23962  | Oasl2   | 0.001 | 1.23   | UP   |
| 320634 | Ocr1    | 0.002 | 1.39   | UP   |
| 23965  | Odz3    | 0.009 | 1.20   | UP   |
| 108155 | Ogt     | 0.005 | 1.25   | UP   |
| 99543  | Olfml3  | 0.000 | 1.25   | UP   |
| 71648  | Optn    | 0.036 | 1.32   | UP   |
| 18438  | P2rx4   | 0.005 | 1.29   | UP   |
| 18813  | Pa2g4   | 0.000 | 0.73   | Down |
| 381404 | Pabpc11 | 0.029 | 593.63 | UP   |
| 211347 | Pank3   | 0.000 | 1.31   | UP   |
| 74229  | Paqr8   | 0.038 | 1.57   | UP   |
| 381038 | Par1    | 0.018 | 0.74   | Down |
| 547253 | Parp14  | 0.004 | 1.28   | UP   |
| 80285  | Parp9   | 0.015 | 1.20   | UP   |
| 170736 | Parvb   | 0.001 | 1.67   | UP   |
| 52033  | Pbk     | 0.035 | 0.75   | Down |
| 75599  | Pcdh1   | 0.002 | 1.52   | UP   |
| 93887  | Pcdhb16 | 0.010 | 2.12   | UP   |
| 93888  | Pcdhb17 | 0.009 | 1.76   | UP   |
| 93706  | Pcdhgc3 | 0.000 | 1.21   | UP   |
| 319263 | Pcmt1   | 0.048 | 1.28   | UP   |
| 245867 | Pcmt2   | 0.034 | 1.54   | UP   |
| 18538  | Pcna    | 0.000 | 0.71   | Down |
| 100102 | Pcsk9   | 0.000 | 4.58   | UP   |

|        |         |       |       |      |
|--------|---------|-------|-------|------|
| 66881  | Pcyox1  | 0.000 | 1.25  | UP   |
| 68671  | Pcyt2   | 0.000 | 1.39  | UP   |
| 207728 | Pde2a   | 0.000 | 2.01  | UP   |
| 54611  | Pde3a   | 0.022 | 1.43  | UP   |
| 18576  | Pde3b   | 0.029 | 1.39  | UP   |
| 18591  | Pdgfb   | 0.000 | 2.22  | UP   |
| 54635  | Pdgfc   | 0.003 | 0.00  | Down |
| 228026 | Pdk1    | 0.000 | 1.47  | UP   |
| 213019 | Pdlim2  | 0.000 | 0.79  | Down |
| 68070  | Pdzd2   | 0.000 | 1.41  | UP   |
| 18613  | Pecam1  | 0.000 | 1.89  | UP   |
| 170676 | Peg10   | 0.000 | 1.22  | UP   |
| 27412  | Peg12   | 0.025 | 0.54  | Down |
| 18616  | Peg3    | 0.008 | 1.78  | UP   |
| 18628  | Per3    | 0.005 | 1.60  | UP   |
| 67199  | Pfdn1   | 0.020 | 0.74  | Down |
| 170768 | Pfkfb3  | 0.032 | 1.29  | UP   |
| 18641  | Pfkl    | 0.000 | 1.23  | UP   |
| 18645  | Pfn2    | 0.005 | 0.75  | Down |
| 18654  | Pgf     | 0.000 | 2.07  | UP   |
| 53328  | Pgrmc1  | 0.001 | 0.81  | Down |
| 18676  | Phf2    | 0.007 | 1.25  | UP   |
| 236539 | Phgdh   | 0.000 | 0.77  | Down |
| 21664  | Phlda1  | 0.018 | 0.75  | Down |
| 18693  | Pick1   | 0.002 | 2.72  | UP   |
| 27392  | Pign    | 0.021 | 1.33  | UP   |
| 216505 | Pik3ip1 | 0.002 | 2.62  | UP   |
| 18711  | Pikfyve | 0.000 | 1.53  | UP   |
| 18763  | Pkd1    | 0.000 | 1.35  | UP   |
| 231507 | Plac8   | 0.000 | 0.68  | Down |
| 211623 | Plac9   | 0.000 | 2.18  | UP   |
| 18792  | Plau    | 0.000 | 1.88  | UP   |
| 18803  | Plcg1   | 0.001 | 1.39  | UP   |
| 18806  | Pld2    | 0.023 | 1.37  | UP   |
| 213783 | Plekhg1 | 0.013 | 1.55  | UP   |
| 18817  | Plk1    | 0.000 | 0.77  | Down |
| 20620  | Plk2    | 0.002 | 0.76  | Down |
| 18822  | Plod1   | 0.000 | 1.24  | UP   |
| 84094  | Plvap   | 0.001 | 2.06  | UP   |
| 18845  | Plxna2  | 0.001 | 1.30  | UP   |
| 67784  | Plxnd1  | 0.000 | 1.53  | UP   |
| 68603  | Pmvk    | 0.016 | 1.33  | UP   |
| 116939 | Pnpla3  | 0.040 | 10.78 | UP   |
| 108767 | Pnrc1   | 0.002 | 1.26  | UP   |



|        |          |       |      |      |
|--------|----------|-------|------|------|
| 18968  | Pola1    | 0.001 | 0.68 | Down |
| 18973  | Pole     | 0.002 | 0.72 | Down |
| 66420  | Polr2e   | 0.021 | 0.81 | Down |
| 20022  | Polr2j   | 0.016 | 0.76 | Down |
| 269823 | Pon3     | 0.043 | 1.28 | UP   |
| 67895  | Ppa1     | 0.003 | 0.80 | Down |
| 19024  | Ppfbp2   | 0.041 | 1.50 | UP   |
| 67738  | Ppid     | 0.006 | 0.69 | Down |
| 70225  | Ppil3    | 0.025 | 0.73 | Down |
| 14208  | Ppm1g    | 0.000 | 0.79 | Down |
| 52040  | Ppp1r10  | 0.030 | 1.22 | UP   |
| 18938  | Ppp1r14b | 0.000 | 0.72 | Down |
| 228852 | Ppp1r16b | 0.000 | 3.11 | UP   |
| 54646  | Ppp1r3f  | 0.016 | 4.31 | UP   |
| 235542 | Ppp2r3a  | 0.039 | 1.24 | UP   |
| 243819 | Ppp6r1   | 0.001 | 1.24 | UP   |
| 233406 | Prc1     | 0.000 | 0.76 | Down |
| 18477  | Prdx1    | 0.000 | 0.83 | Down |
| 54683  | Prdx5    | 0.000 | 0.82 | Down |
| 109294 | Prex2    | 0.001 | 1.37 | UP   |
| 19076  | Prim2    | 0.024 | 0.74 | Down |
| 19092  | Prkg2    | 0.007 | 0.26 | Down |
| 15469  | Prmt1    | 0.000 | 0.76 | Down |
| 26434  | Prnd     | 0.000 | 1.79 | UP   |
| 328099 | Prps113  | 0.049 | 0.77 | Down |
| 110639 | Prps2    | 0.001 | 0.63 | Down |
| 226562 | Prrc2c   | 0.000 | 1.22 | UP   |
| 69017  | Prrt2    | 0.042 | 2.22 | UP   |
| 107272 | Psat1    | 0.000 | 0.81 | Down |
| 234353 | Psd3     | 0.000 | 1.37 | UP   |
| 19166  | Psma2    | 0.000 | 0.81 | Down |
| 26444  | Psma7    | 0.015 | 0.82 | Down |
| 19172  | Psemb4   | 0.003 | 0.82 | Down |
| 19173  | Psemb5   | 0.018 | 0.78 | Down |
| 19175  | Psemb6   | 0.003 | 0.79 | Down |
| 19184  | Psmc5    | 0.001 | 0.80 | Down |
| 59029  | Psmd14   | 0.002 | 0.79 | Down |
| 19206  | Ptch1    | 0.005 | 2.09 | UP   |
| 56351  | Ptges3   | 0.000 | 0.75 | Down |
| 19242  | Ptn      | 0.030 | 1.79 | UP   |
| 19243  | Ptp4a1   | 0.006 | 0.73 | Down |
| 24000  | Ptpn21   | 0.038 | 0.81 | Down |
| 19275  | Ptpn     | 0.045 | 1.33 | UP   |
| 19288  | Ptx3     | 0.000 | 0.70 | Down |

|        |          |       |      |      |
|--------|----------|-------|------|------|
| 19290  | Pura     | 0.046 | 0.79 | Down |
| 52118  | Pvr      | 0.049 | 0.79 | Down |
| 66194  | Pycl     | 0.046 | 0.66 | Down |
| 53869  | Rab11a   | 0.000 | 0.74 | Down |
| 76877  | Rab36    | 0.025 | 4.10 | UP   |
| 74760  | Rab3il1  | 0.035 | 1.30 | UP   |
| 216363 | Rab3ip   | 0.021 | 0.75 | Down |
| 19344  | Rab5b    | 0.000 | 1.30 | UP   |
| 19352  | Rabggtb  | 0.024 | 0.78 | Down |
| 19362  | Rad51ap1 | 0.001 | 0.56 | Down |
| 66679  | Rae1     | 0.004 | 0.72 | Down |
| 228850 | Ralgapb  | 0.011 | 1.24 | UP   |
| 19730  | Ralgds   | 0.011 | 1.33 | UP   |
| 19384  | Ran      | 0.000 | 0.77 | Down |
| 19385  | Ranbp1   | 0.000 | 0.79 | Down |
| 19387  | Rangap1  | 0.000 | 0.79 | Down |
| 217944 | Rapgef5  | 0.019 | 1.96 | UP   |
| 77300  | Raph1    | 0.007 | 1.25 | UP   |
| 69903  | Rasip1   | 0.002 | 1.84 | UP   |
| 215653 | Rassf2   | 0.015 | 1.40 | UP   |
| 245688 | Rbbp7    | 0.000 | 0.81 | Down |
| 19650  | Rbl1     | 0.029 | 0.73 | Down |
| 56275  | Rbm14    | 0.021 | 1.28 | UP   |
| 209003 | Rbmx2    | 0.036 | 0.62 | Down |
| 98711  | Rdh10    | 0.007 | 1.42 | UP   |
| 68703  | Rere     | 0.000 | 1.24 | UP   |
| 19718  | Rfc2     | 0.006 | 0.75 | Down |
| 53970  | Rfx5     | 0.003 | 1.60 | UP   |
| 19727  | Rfxank   | 0.041 | 1.58 | UP   |
| 242406 | Rgp1     | 0.032 | 1.32 | UP   |
| 19734  | Rgs16    | 0.015 | 1.29 | UP   |
| 78757  | Rictor   | 0.006 | 1.42 | UP   |
| 225870 | Rin1     | 0.038 | 0.62 | Down |
| 74030  | Rin2     | 0.002 | 1.39 | UP   |
| 74194  | Rnd3     | 0.013 | 0.77 | Down |
| 81018  | Rnf114   | 0.029 | 1.28 | UP   |
| 24018  | Rngtt    | 0.037 | 0.68 | Down |
| 74144  | Robo4    | 0.000 | 1.92 | UP   |
| 68275  | Rpa1     | 0.001 | 0.83 | Down |
| 67025  | Rpl11    | 0.000 | 0.81 | Down |
| 65019  | Rpl23    | 0.000 | 0.77 | Down |
| 57808  | Rpl35a   | 0.000 | 0.79 | Down |
| 67248  | Rpl39    | 0.000 | 0.78 | Down |
| 20005  | Rpl9     | 0.000 | 0.83 | Down |

|        |         |       |      |      |
|--------|---------|-------|------|------|
| 56040  | Rplp1   | 0.000 | 0.80 | Down |
| 67186  | Rplp2   | 0.000 | 0.70 | Down |
| 67097  | Rps10   | 0.000 | 0.78 | Down |
| 267019 | Rps15a  | 0.000 | 0.82 | Down |
| 20068  | Rps17   | 0.000 | 0.82 | Down |
| 66481  | Rps21   | 0.000 | 0.82 | Down |
| 75617  | Rps25   | 0.000 | 0.83 | Down |
| 78294  | Rps27a  | 0.000 | 0.81 | Down |
| 67941  | Rps271  | 0.000 | 0.76 | Down |
| 20090  | Rps29   | 0.000 | 0.79 | Down |
| 20116  | Rps8    | 0.000 | 0.77 | Down |
| 66922  | Rras2   | 0.000 | 0.68 | Down |
| 20133  | Rrm1    | 0.000 | 0.81 | Down |
| 20135  | Rrm2    | 0.000 | 0.62 | Down |
| 59014  | Rrs1    | 0.003 | 0.77 | Down |
| 58185  | Rsad2   | 0.000 | 2.92 | UP   |
| 225215 | Rsl24d1 | 0.014 | 0.71 | Down |
| 70432  | Rufy2   | 0.022 | 1.39 | UP   |
| 66521  | Rwdd1   | 0.008 | 0.81 | Down |
| 20194  | S100a10 | 0.000 | 0.71 | Down |
| 20198  | S100a4  | 0.000 | 0.77 | Down |
| 20200  | S100a6  | 0.000 | 0.73 | Down |
| 13609  | S1pr1   | 0.018 | 1.30 | UP   |
| 56459  | Sae1    | 0.000 | 0.80 | Down |
| 217125 | Samd14  | 0.016 | 1.51 | UP   |
| 209086 | Samd9l  | 0.002 | 1.25 | UP   |
| 66234  | Sc4mol  | 0.000 | 1.38 | UP   |
| 235293 | Sc5d    | 0.000 | 1.51 | UP   |
| 20778  | Scarb1  | 0.000 | 1.38 | UP   |
| 380713 | Scarf1  | 0.037 | 2.80 | UP   |
| 20249  | Scd1    | 0.000 | 1.69 | UP   |
| 20250  | Scd2    | 0.000 | 1.55 | UP   |
| 64929  | Scel    | 0.001 | 0.71 | Down |
| 20266  | Scn1b   | 0.021 | 1.31 | UP   |
| 20272  | Scn7a   | 0.000 | 1.43 | UP   |
| 56367  | Scoc    | 0.001 | 0.70 | Down |
| 20289  | Scx     | 0.041 | 0.29 | Down |
| 20970  | Sdc3    | 0.000 | 1.34 | UP   |
| 67680  | Sdhb    | 0.005 | 0.79 | Down |
| 20324  | Sdpr    | 0.002 | 0.80 | Down |
| 227648 | Sec16a  | 0.000 | 1.23 | UP   |
| 20335  | Sec61g  | 0.015 | 0.83 | Down |
| 114679 | Selm    | 0.012 | 0.79 | Down |
| 20344  | Selp    | 0.001 | 1.47 | UP   |

|        |           |       |      |      |
|--------|-----------|-------|------|------|
| 20350  | Sema3f    | 0.002 | 1.65 | UP   |
| 20359  | Sema6b    | 0.014 | 1.64 | UP   |
| 214968 | Sema6d    | 0.000 | 1.41 | UP   |
| 20361  | Sema7a    | 0.008 | 1.85 | UP   |
| 75826  | Senp2     | 0.028 | 0.78 | Down |
| 20363  | Sepp1     | 0.000 | 1.42 | UP   |
| 20715  | Serpina3g | 0.000 | 1.69 | UP   |
| 546546 | Serpina3h | 0.001 | 3.50 | UP   |
| 20716  | Serpina3n | 0.000 | 1.42 | UP   |
| 20706  | Serpinb9b | 0.000 | 0.76 | Down |
| 18787  | Serpine1  | 0.000 | 0.76 | Down |
| 12258  | Serping1  | 0.000 | 1.23 | UP   |
| 56086  | Set       | 0.000 | 0.79 | Down |
| 269254 | Setx      | 0.000 | 1.28 | UP   |
| 20319  | Sfrp2     | 0.000 | 1.28 | UP   |
| 20393  | Sgk1      | 0.000 | 0.82 | Down |
| 27387  | Sh2d3c    | 0.030 | 1.79 | UP   |
| 230863 | Sh2d5     | 0.034 | 2.36 | UP   |
| 231147 | Sh3tc1    | 0.003 | 2.59 | UP   |
| 58234  | Shank3    | 0.001 | 1.91 | UP   |
| 20419  | Shcbp1    | 0.029 | 0.73 | Down |
| 214547 | She       | 0.007 | 2.48 | UP   |
| 75991  | Slain2    | 0.012 | 1.27 | UP   |
| 20492  | Slbp      | 0.019 | 0.76 | Down |
| 75750  | Slc10a6   | 0.037 | 1.58 | UP   |
| 20502  | Slc16a2   | 0.000 | 1.23 | UP   |
| 80879  | Slc16a3   | 0.000 | 1.37 | UP   |
| 20514  | Slc1a5    | 0.000 | 1.24 | UP   |
| 20513  | Slc1a6    | 0.001 | 0.57 | Down |
| 20516  | Slc20a2   | 0.003 | 0.81 | Down |
| 13358  | Slc25a1   | 0.000 | 1.21 | UP   |
| 63959  | Slc29a1   | 0.014 | 0.81 | Down |
| 71279  | Slc29a3   | 0.040 | 1.31 | UP   |
| 227659 | Slc2a6    | 0.000 | 2.75 | UP   |
| 227059 | Slc39a10  | 0.000 | 1.45 | UP   |
| 100434 | Slc44a1   | 0.030 | 1.21 | UP   |
| 20536  | Slc4a3    | 0.002 | 1.89 | UP   |
| 20541  | Slc8a1    | 0.039 | 1.27 | UP   |
| 327978 | Slfn5     | 0.000 | 1.44 | UP   |
| 276950 | Slfn8     | 0.002 | 1.51 | UP   |
| 17130  | Smad6     | 0.015 | 0.83 | Down |
| 93762  | Smarca5   | 0.014 | 0.82 | Down |
| 64074  | Smoc2     | 0.000 | 1.25 | UP   |
| 67847  | Snaip     | 0.004 | 2.05 | UP   |

|        |         |       |      |      |
|--------|---------|-------|------|------|
| 208777 | Sned1   | 0.028 | 1.54 | UP   |
| 319317 | Snhg11  | 0.040 | 4.31 | UP   |
| 20623  | Snrk    | 0.001 | 1.43 | UP   |
| 68981  | Snrpa1  | 0.000 | 0.69 | Down |
| 20638  | Snrpb   | 0.000 | 0.78 | Down |
| 20641  | Snrpd1  | 0.000 | 0.64 | Down |
| 20643  | Snrpe   | 0.000 | 0.57 | Down |
| 12702  | Socs3   | 0.000 | 1.24 | UP   |
| 20657  | Sod3    | 0.000 | 1.24 | UP   |
| 20411  | Sorbs1  | 0.011 | 0.69 | Down |
| 234214 | Sorbs2  | 0.017 | 1.53 | UP   |
| 20672  | Sox18   | 0.000 | 2.50 | UP   |
| 20680  | Sox7    | 0.003 | 1.82 | UP   |
| 20684  | Sp100   | 0.000 | 1.40 | UP   |
| 13602  | Sparc11 | 0.000 | 1.52 | UP   |
| 219140 | Spata13 | 0.000 | 2.39 | UP   |
| 66442  | Spc25   | 0.016 | 0.72 | Down |
| 74392  | Specc11 | 0.014 | 1.23 | UP   |
| 216892 | Spns2   | 0.001 | 1.98 | UP   |
| 233744 | Spon1   | 0.000 | 1.31 | UP   |
| 20751  | Spr     | 0.048 | 0.76 | Down |
| 20775  | Sqlc    | 0.000 | 1.41 | UP   |
| 20788  | Srebf2  | 0.000 | 1.29 | UP   |
| 117600 | Srgap1  | 0.000 | 1.53 | UP   |
| 19073  | Srgn    | 0.028 | 1.92 | UP   |
| 20810  | Srm     | 0.000 | 0.81 | Down |
| 68792  | Srpx2   | 0.000 | 1.22 | UP   |
| 110809 | Srsf1   | 0.000 | 0.81 | Down |
| 20383  | Srsf3   | 0.000 | 0.77 | Down |
| 76650  | Srxn1   | 0.000 | 0.78 | Down |
| 237860 | Ssh2    | 0.004 | 1.71 | UP   |
| 20833  | Ssrp1   | 0.000 | 0.79 | Down |
| 20452  | St8sia4 | 0.045 | 2.29 | UP   |
| 192187 | Stab1   | 0.000 | 1.89 | UP   |
| 170459 | Stard4  | 0.000 | 1.45 | UP   |
| 20846  | Stat1   | 0.000 | 1.31 | UP   |
| 20847  | Stat2   | 0.000 | 1.44 | UP   |
| 70358  | Steap1  | 0.010 | 0.77 | Down |
| 68428  | Steap3  | 0.000 | 1.28 | UP   |
| 117167 | Steap4  | 0.000 | 1.65 | UP   |
| 106504 | Stk38   | 0.000 | 1.29 | UP   |
| 16765  | Stmn1   | 0.000 | 0.72 | Down |
| 74732  | Stx11   | 0.003 | 1.79 | UP   |
| 20910  | Stxbp1  | 0.006 | 1.21 | UP   |

|        |          |       |      |      |
|--------|----------|-------|------|------|
| 56451  | Suclg1   | 0.002 | 0.76 | Down |
| 22218  | Sumo1    | 0.004 | 0.81 | Down |
| 225115 | Svil     | 0.007 | 1.27 | UP   |
| 319565 | Syne2    | 0.002 | 1.24 | UP   |
| 118449 | Synpo2   | 0.015 | 1.49 | UP   |
| 57752  | Tacc2    | 0.005 | 0.75 | Down |
| 21335  | Tacc3    | 0.000 | 0.72 | Down |
| 270627 | Taf1     | 0.004 | 1.24 | UP   |
| 108143 | Taf9     | 0.011 | 0.83 | Down |
| 21345  | Tagln    | 0.000 | 0.70 | Down |
| 21351  | Taldo1   | 0.000 | 0.81 | Down |
| 66860  | Tanc1    | 0.003 | 1.32 | UP   |
| 21356  | Tapbp    | 0.000 | 1.28 | UP   |
| 230908 | Tardbp   | 0.000 | 0.79 | Down |
| 381801 | Tatdn2   | 0.011 | 0.77 | Down |
| 381085 | Tbc1d22b | 0.036 | 1.33 | UP   |
| 67016  | Tbc1d2b  | 0.000 | 1.25 | UP   |
| 272589 | Tbcel    | 0.042 | 1.31 | UP   |
| 21372  | Tbl1x    | 0.010 | 1.23 | UP   |
| 67923  | Tceb1    | 0.015 | 0.74 | Down |
| 106795 | Tcf19    | 0.026 | 0.78 | Down |
| 21411  | Tcf20    | 0.036 | 1.22 | UP   |
| 27060  | Tcirg1   | 0.000 | 1.35 | UP   |
| 21453  | Tcof1    | 0.000 | 0.71 | Down |
| 70381  | Tecpr1   | 0.042 | 1.37 | UP   |
| 21687  | Tek      | 0.001 | 1.33 | UP   |
| 214133 | Tet2     | 0.006 | 1.85 | UP   |
| 21810  | Tgfbi    | 0.000 | 1.84 | UP   |
| 21817  | Tgm2     | 0.000 | 1.53 | UP   |
| 21824  | Thbd     | 0.000 | 0.66 | Down |
| 21826  | Thbs2    | 0.000 | 1.28 | UP   |
| 21827  | Thbs3    | 0.002 | 1.43 | UP   |
| 330267 | Thsd7a   | 0.037 | 1.26 | UP   |
| 21846  | Tie1     | 0.004 | 1.81 | UP   |
| 21854  | Timm17a  | 0.005 | 0.73 | Down |
| 30058  | Timm8a1  | 0.032 | 0.69 | Down |
| 66131  | Tipin    | 0.032 | 0.73 | Down |
| 21877  | Tk1      | 0.019 | 0.77 | Down |
| 68385  | Tlcd1    | 0.006 | 1.68 | UP   |
| 380712 | Tlcd2    | 0.037 | 1.41 | UP   |
| 17112  | Tm4sf1   | 0.000 | 0.82 | Down |
| 68212  | Tmbim4   | 0.042 | 0.75 | Down |
| 320534 | Tmem104  | 0.027 | 1.30 | UP   |
| 215210 | Tmem120a | 0.047 | 0.79 | Down |

|        |           |       |      |      |
|--------|-----------|-------|------|------|
| 232086 | Tmem150a  | 0.001 | 1.46 | UP   |
| 621976 | Tmem170b  | 0.049 | 1.43 | UP   |
| 66058  | Tmem176a  | 0.000 | 1.32 | UP   |
| 65963  | Tmem176b  | 0.000 | 1.21 | UP   |
| 170706 | Tmem37    | 0.011 | 0.44 | Down |
| 100201 | Tmem64    | 0.033 | 1.25 | UP   |
| 67020  | Tmem88    | 0.042 | 2.22 | UP   |
| 19241  | Tmsb4x    | 0.000 | 0.75 | Down |
| 387314 | Tmtc1     | 0.006 | 1.57 | UP   |
| 18383  | Tnfrsf11b | 0.007 | 1.57 | UP   |
| 27279  | Tnfrsf12a | 0.000 | 0.69 | Down |
| 665113 | Tnik      | 0.025 | 2.04 | UP   |
| 57783  | Tnip1     | 0.000 | 1.33 | UP   |
| 21951  | Tnks      | 0.000 | 1.53 | UP   |
| 67952  | Tomm20    | 0.000 | 0.71 | Down |
| 66169  | Tomm7     | 0.049 | 0.69 | Down |
| 106021 | Topors    | 0.011 | 0.82 | Down |
| 30935  | Tor3a     | 0.020 | 1.27 | UP   |
| 22004  | Tpm2      | 0.000 | 0.69 | Down |
| 217410 | Trib2     | 0.042 | 0.76 | Down |
| 20128  | Trim30a   | 0.000 | 1.95 | UP   |
| 384309 | Trim56    | 0.038 | 1.54 | UP   |
| 66949  | Trim59    | 0.001 | 0.72 | Down |
| 101700 | Trim68    | 0.021 | 2.21 | UP   |
| 109181 | Trip11    | 0.013 | 1.35 | UP   |
| 69716  | Trip13    | 0.000 | 0.63 | Down |
| 277414 | Trp53i11  | 0.000 | 1.90 | UP   |
| 60599  | Trp53inp1 | 0.001 | 1.43 | UP   |
| 68728  | Trp53inp2 | 0.000 | 1.39 | UP   |
| 83925  | Trps1     | 0.037 | 1.28 | UP   |
| 64930  | Tsc1      | 0.001 | 1.38 | UP   |
| 66637  | Tsen15    | 0.020 | 0.64 | Down |
| 22099  | Tsn       | 0.018 | 0.83 | Down |
| 241556 | Tspan18   | 0.041 | 1.58 | UP   |
| 52808  | Tspyl2    | 0.010 | 1.23 | UP   |
| 74569  | Ttc17     | 0.008 | 1.35 | UP   |
| 218343 | Ttc37     | 0.018 | 1.31 | UP   |
| 22143  | Tuba1b    | 0.000 | 0.71 | Down |
| 22146  | Tuba1c    | 0.000 | 0.67 | Down |
| 22152  | Tubb3     | 0.004 | 0.81 | Down |
| 227613 | Tubb4b    | 0.000 | 0.74 | Down |
| 22154  | Tubb5     | 0.000 | 0.74 | Down |
| 67951  | Tubb6     | 0.000 | 0.74 | Down |
| 233870 | Tufm      | 0.009 | 0.82 | Down |

|        |         |       |      |      |
|--------|---------|-------|------|------|
| 22166  | Txn1    | 0.000 | 0.78 | Down |
| 50493  | Txnrd1  | 0.000 | 0.70 | Down |
| 232223 | Txnrd3  | 0.011 | 1.66 | UP   |
| 22171  | Tyms    | 0.018 | 0.81 | Down |
| 108121 | U2af1   | 0.001 | 0.74 | Down |
| 50995  | Uba2    | 0.002 | 0.81 | Down |
| 74153  | Uba7    | 0.003 | 1.41 | UP   |
| 68612  | Ube2c   | 0.004 | 0.78 | Down |
| 56550  | Ube2d2  | 0.001 | 0.83 | Down |
| 77891  | Ube2s   | 0.000 | 0.76 | Down |
| 140630 | Ube4a   | 0.002 | 1.28 | UP   |
| 68795  | Ubr3    | 0.017 | 1.24 | UP   |
| 224111 | Ubxn7   | 0.022 | 1.30 | UP   |
| 56207  | Uchl5   | 0.013 | 0.71 | Down |
| 18140  | Uhrf1   | 0.000 | 0.75 | Down |
| 107448 | Unc5a   | 0.032 | 1.44 | UP   |
| 54445  | Unc93b1 | 0.000 | 1.52 | UP   |
| 22224  | Usp10   | 0.024 | 0.78 | Down |
| 59025  | Usp14   | 0.000 | 0.73 | Down |
| 338362 | Ust     | 0.001 | 1.63 | UP   |
| 195434 | Utp14b  | 0.013 | 1.68 | UP   |
| 22288  | Utrn    | 0.015 | 1.23 | UP   |
| 238328 | Vash1   | 0.000 | 2.18 | UP   |
| 22335  | Vdac3   | 0.000 | 0.81 | Down |
| 22339  | Vegfa   | 0.000 | 1.33 | UP   |
| 666173 | Vps13b  | 0.013 | 1.36 | UP   |
| 320528 | Vps13c  | 0.019 | 1.25 | UP   |
| 230895 | Vps13d  | 0.010 | 1.26 | UP   |
| 69091  | Vps26b  | 0.010 | 0.81 | Down |
| 67776  | Vwa5a   | 0.001 | 1.23 | UP   |
| 22378  | Wbp2    | 0.000 | 1.27 | UP   |
| 75410  | Wbp7    | 0.001 | 1.39 | UP   |
| 79565  | Wbscr27 | 0.001 | 1.99 | UP   |
| 268752 | Wdfy2   | 0.004 | 2.27 | UP   |
| 22388  | Wdr1    | 0.000 | 0.83 | Down |
| 216156 | Wdr18   | 0.005 | 0.74 | Down |
| 104082 | Wdr7    | 0.004 | 1.32 | UP   |
| 73674  | Wdr75   | 0.026 | 0.81 | Down |
| 107823 | Whsc1   | 0.001 | 0.77 | Down |
| 234135 | Whsc111 | 0.025 | 1.22 | UP   |
| 78428  | Wibg    | 0.034 | 0.69 | Down |
| 69847  | Wnk4    | 0.025 | 4.10 | UP   |
| 321003 | Xpnpep3 | 0.027 | 2.27 | UP   |
| 24127  | Xrn1    | 0.033 | 1.47 | UP   |



|        |         |       |      |      |
|--------|---------|-------|------|------|
| 77864  | Ypel2   | 0.021 | 1.77 | UP   |
| 229096 | Ythdf3  | 0.020 | 1.22 | UP   |
| 667118 | Zbed6   | 0.002 | 1.45 | UP   |
| 58203  | Zbp1    | 0.001 | 1.31 | UP   |
| 56805  | Zbtb33  | 0.007 | 1.53 | UP   |
| 245007 | Zbtb38  | 0.000 | 1.39 | UP   |
| 241322 | Zbtb6   | 0.036 | 1.58 | UP   |
| 244871 | Zc3h12c | 0.013 | 1.74 | UP   |
| 78781  | Zc3hav1 | 0.000 | 1.35 | UP   |
| 71918  | Zcchc24 | 0.000 | 1.31 | UP   |
| 214290 | Zcchc6  | 0.000 | 1.33 | UP   |
| 24136  | Zeb2    | 0.000 | 1.21 | UP   |
| 30046  | Zfp292  | 0.000 | 1.50 | UP   |
| 22695  | Zfp36   | 0.000 | 1.30 | UP   |
| 12192  | Zfp3611 | 0.000 | 1.26 | UP   |
| 235682 | Zfp445  | 0.003 | 1.28 | UP   |
| 225207 | Zfp521  | 0.020 | 1.27 | UP   |
| 434377 | Zfp560  | 0.035 | 2.03 | UP   |
| 269023 | Zfp608  | 0.004 | 1.59 | UP   |
| 70227  | Zfp619  | 0.027 | 2.70 | UP   |
| 78266  | Zfp687  | 0.005 | 1.34 | UP   |
| 235050 | Zfp810  | 0.000 | 1.97 | UP   |
| 211978 | Zfyve26 | 0.001 | 1.39 | UP   |
| 22401  | Zmat3   | 0.022 | 0.81 | Down |
| 328365 | Zmiz1   | 0.000 | 1.23 | UP   |
| 98999  | Znfx1   | 0.000 | 1.34 | UP   |
| 229937 | Znhit6  | 0.030 | 0.66 | Down |
| 66136  | Znrd1   | 0.036 | 0.65 | Down |
| 414872 | Zyg11b  | 0.049 | 1.21 | UP   |
| 22793  | Zyx     | 0.000 | 0.83 | Down |

---

**Supplemental Table 3. Significant different genes in cardiac fibroblasts of ATF3KO mice compared to cardiac fibroblasts of WT mice after Ang II infusion.**

| <b>Gene symbol</b>         | <b>Gene name</b>                                               | <b>WT<br/>CF</b> | <b>ATF3KO<br/>-CF</b> | <b>Fold-<br/>Change</b> |
|----------------------------|----------------------------------------------------------------|------------------|-----------------------|-------------------------|
| <b>Fibrotic genes:</b>     |                                                                |                  |                       |                         |
| Col14a1                    | collagen, type XIV, alpha 1                                    | 31.67            | 40.85                 | 1.29                    |
| Col18a1                    | collagen, type XVIII, alpha 1                                  | 6.52             | 10.15                 | 1.56                    |
| Col27a1                    | collagen, type XXVII, alpha 1                                  | 0.95             | 1.81                  | 1.89                    |
| Col3a1                     | collagen, type III, alpha 1                                    | 1511.39          | 1928.46               | 1.28                    |
| Col6a1                     | collagen, type VI, alpha 1                                     | 91.88            | 112.86                | 1.23                    |
| Ctgf                       | connective tissue growth factor                                | 306.50           | 252.91                | 0.83                    |
| Fbl                        | fibrillarlin                                                   | 115.73           | 91.33                 | 0.79                    |
| Fndc1                      | fibronectin type III domain containing 1                       | 64.84            | 87.91                 | 1.36                    |
| Fndc3a                     | fibronectin type III domain containing 3A                      | 24.31            | 33.31                 | 1.37                    |
| Fndc3b                     | fibronectin type III domain containing 3B                      | 40.27            | 50.15                 | 1.25                    |
| Fgf23                      | fibroblast growth factor 23                                    | 2.77             | 5.68                  | 2.05                    |
| Thbs2                      | thrombospondin 2                                               | 96.81            | 124.36                | 1.28                    |
| Thbs3                      | thrombospondin 3                                               | 10.77            | 15.37                 | 1.43                    |
| Tgfb1                      | transforming growth factor, beta induced                       | 17.78            | 32.81                 | 1.84                    |
| <b>Hypertropic genes:</b>  |                                                                |                  |                       |                         |
| Itga1                      | integrin alpha 1                                               | 5.98             | 8.26                  | 1.38                    |
| Itga11                     | integrin alpha 11                                              | 6.63             | 9.02                  | 1.36                    |
| Itga3                      | integrin alpha 3                                               | 3.56             | 5.49                  | 1.54                    |
| Itga6                      | integrin alpha 6                                               | 2.00             | 3.66                  | 1.82                    |
| Itgb2                      | integrin beta 2                                                | 3.74             | 6.84                  | 1.83                    |
| Itgb3                      | integrin beta 3                                                | 4.14             | 5.94                  | 1.44                    |
| Itgb5                      | integrin beta 5                                                | 141.30           | 173.46                | 1.23                    |
| Dag1                       | dystroglycan 1                                                 | 48.25            | 63.34                 | 1.31                    |
| Agrn                       | agrin                                                          | 6.13             | 8.22                  | 1.34                    |
| Lama5                      | laminin, alpha 5                                               | 1.79             | 2.71                  | 1.51                    |
| Il6st                      | interleukin 6 signal transducer                                | 199.52           | 256.85                | 1.29                    |
| Igf1                       | insulin-like growth factor 1                                   | 11.97            | 15.99                 | 1.34                    |
| Igfbp3                     | insulin-like growth factor binding protein 3                   | 70.77            | 99.29                 | 1.40                    |
| Igfbp5                     | insulin-like growth factor binding protein 5                   | 4.23             | 11.91                 | 2.81                    |
| Edn1                       | endothelin-1                                                   | 25.99            | 34.58                 | 1.33                    |
| Ace                        | angiotensin I converting enzyme (peptidyl-<br>dipeptidase A) 1 | 4.16             | 7.19                  | 1.73                    |
| <b>Inflammatory genes:</b> |                                                                |                  |                       |                         |
| Ccl11                      | chemokine (C-C motif) ligand 11                                | 16.61            | 24.26                 | 1.46                    |
| Ccl6                       | chemokine (C-C motif) ligand 6                                 | 5.08             | 9.00                  | 1.77                    |
| Ccl8                       | chemokine (C-C motif) ligand 8                                 | 57.65            | 104.74                | 1.82                    |
| Ccl9                       | chemokine (C-C motif) ligand 9                                 | 14.33            | 22.24                 | 1.55                    |

|           |                                                        |        |        |      |
|-----------|--------------------------------------------------------|--------|--------|------|
| Cxcl10    | chemokine (C-X-C motif) ligand 10                      | 0.46   | 4.27   | 9.35 |
| Cxcl12    | chemokine (C-X-C motif) ligand 12                      | 143.91 | 190.23 | 1.32 |
| Il2rg     | interleukin 2 receptor, gamma chain                    | 4.72   | 8.13   | 1.72 |
| Il33      | interleukin 33                                         | 23.08  | 31.31  | 1.36 |
| Irf1      | interferon regulatory factor 1                         | 14.01  | 18.76  | 1.34 |
| Irf7      | interferon regulatory factor 7                         | 29.39  | 43.43  | 1.48 |
| C1qtnf1   | C1q and tumor necrosis factor related protein 1        | 8.11   | 11.25  | 1.39 |
| C1qtnf6   | C1q and tumor necrosis factor related protein 6        | 36.27  | 48.19  | 1.33 |
| C1rl      | complement component 1, r subcomponent-like            | 7.10   | 10.97  | 1.54 |
| C1s       | complement component 1, s subcomponent                 | 14.51  | 25.55  | 1.76 |
| C3        | complement component 3                                 | 107.32 | 159.17 | 1.48 |
| C4b       | complement component 4B (Childo blood group)           | 7.91   | 10.81  | 1.37 |
| Tnfrsf11b | tumor necrosis factor receptor superfamily, member 11b | 5.81   | 9.11   | 1.57 |

---

**Supplemental Table 4. The list of 31 genes identified by overlay of the transcriptome in ATF3 depleted fibroblast and Chip sequencing for ATF3 binding sites**

| Symbol        | RNA-seq Data   |             |            |                | CHIP-seq Data   |                |             |                |
|---------------|----------------|-------------|------------|----------------|-----------------|----------------|-------------|----------------|
|               | ATF3KO-        |             | FC         | FDR            | Adcon-<br>count | ATF3-<br>count | FC          | FDR            |
|               | WT-CF<br>-RPKM | CF-<br>RPKM |            |                |                 |                |             |                |
| Npy1r         | 0.5            | 1.4         | 2.9        | 4.3E-02        | 0.0             | 4.2            | 30.8        | 1.6E-73        |
| <b>Map2k3</b> | <b>26.0</b>    | <b>54.5</b> | <b>2.1</b> | <b>0.0E+00</b> | <b>0.0</b>      | <b>3.7</b>     | <b>26.8</b> | <b>1.0E-60</b> |
| Mttp          | 1.0            | 2.0         | 2.0        | 3.2E-02        | 0.0             | 3.0            | 21.5        | 1.5E-44        |
| Dnm3os        | 1.9            | 3.7         | 2.0        | 0.0E+00        | 0.0             | 2.8            | 20.2        | 1.1E-40        |
| Col27a1       | 1.0            | 1.8         | 1.9        | 7.0E-03        | 0.0             | 2.6            | 18.9        | 6.4E-37        |
| Elk4          | 2.3            | 3.9         | 1.7        | 2.5E-02        | 0.0             | 2.4            | 17.6        | 3.0E-33        |
| Serpina3g     | 14.3           | 24.2        | 1.7        | 0.0E+00        | 0.0             | 2.3            | 17.1        | 4.7E-32        |
| Steap4        | 8.2            | 13.5        | 1.7        | 0.0E+00        | 0.0             | 2.2            | 16.3        | 1.1E-29        |
| Dock4         | 2.0            | 3.2         | 1.6        | 2.0E-03        | 0.0             | 2.1            | 15.4        | 2.3E-27        |
| Dhcr24        | 58.0           | 90.5        | 1.6        | 0.0E+00        | 0.0             | 2.0            | 14.9        | 3.1E-26        |
| Gfra1         | 5.7            | 8.8         | 1.5        | 5.0E-03        | 0.0             | 2.0            | 14.5        | 4.1E-25        |
| Itga3         | 3.6            | 5.5         | 1.5        | 8.0E-03        | 0.0             | 1.8            | 13.6        | 6.5E-23        |
| Ifit3         | 24.2           | 36.9        | 1.5        | 0.0E+00        | 0.0             | 1.8            | 13.6        | 6.5E-23        |
| Ccl11         | 16.6           | 24.3        | 1.5        | 2.6E-02        | 0.0             | 1.8            | 13.2        | 7.9E-22        |
| Arrdc3        | 5.0            | 7.2         | 1.4        | 2.0E-02        | 0.0             | 1.8            | 13.2        | 7.9E-22        |
| Rdh10         | 12.3           | 17.4        | 1.4        | 7.0E-03        | 0.0             | 1.7            | 12.8        | 8.9E-21        |
| Bcl9          | 5.1            | 7.0         | 1.4        | 3.3E-02        | 0.0             | 1.7            | 12.8        | 8.9E-21        |
| Calcocol1     | 14.8           | 20.5        | 1.4        | 2.0E-03        | 0.0             | 1.7            | 12.3        | 1.0E-19        |
| Atrx          | 9.8            | 13.3        | 1.4        | 0.0E+00        | 0.0             | 1.7            | 12.3        | 1.0E-19        |
| Nktr          | 15.0           | 20.4        | 1.4        | 0.0E+00        | 0.0             | 1.5            | 11.4        | 1.1E-17        |
| Zfp687        | 9.8            | 13.1        | 1.3        | 5.0E-03        | 0.0             | 1.5            | 11.4        | 1.1E-17        |
| Nbr1          | 33.1           | 42.8        | 1.3        | 0.0E+00        | 0.0             | 1.5            | 11.4        | 1.1E-17        |
| Cp            | 62.4           | 80.1        | 1.3        | 0.0E+00        | 0.0             | 1.5            | 11.0        | 1.1E-16        |
| Rnf114        | 15.0           | 19.2        | 1.3        | 2.9E-02        | 0.0             | 1.5            | 11.0        | 1.1E-16        |
| Trps1         | 3.9            | 5.0         | 1.3        | 3.7E-02        | 0.0             | 1.5            | 11.0        | 1.1E-16        |
| Junb          | 185.0          | 233.4       | 1.3        | 0.0E+00        | 0.0             | 1.5            | 11.0        | 1.1E-16        |
| Camta2        | 10.3           | 12.9        | 1.3        | 4.1E-02        | 0.0             | 1.5            | 11.0        | 1.1E-16        |
| Syne2         | 4.8            | 5.9         | 1.2        | 2.0E-03        | 0.0             | 1.4            | 10.6        | 9.9E-16        |
| Utrn          | 6.1            | 7.5         | 1.2        | 1.5E-02        | 0.0             | 1.4            | 10.6        | 9.9E-16        |
| Prrc2c        | 24.4           | 29.7        | 1.2        | 0.0E+00        | 0.0             | 1.4            | 10.1        | 9.0E-15        |
| Kcnq1ot1      | 1.3            | 1.5         | 1.2        | 9.0E-03        | 0.0             | 1.4            | 10.1        | 9.0E-15        |

**Supplemental Table 5. Demographic information of five enrolled HCM patients.**

|                                              | Patient 1 | Patient 2 | Patient 3 | Patient 4 | Patient 5 |
|----------------------------------------------|-----------|-----------|-----------|-----------|-----------|
| <b>Clinical/demographic features</b>         |           |           |           |           |           |
| Male                                         | YES       | YES       | YES       | YES       | NO        |
| Age at presentation, years                   | 52        | 54        | 59        | 51        | 48        |
| Family history of HCM                        | NO        | NO        | NO        | NO        | NO        |
| Syncope                                      | YES       | NO        | NO        | NO        | NO        |
| Hypertension                                 | YES       | YES       | YES       | YES       | YES       |
| Systolic blood pressure, mmHg                | 160       | 140       | 180       | 140       | 168       |
| Diastolic blood pressure, mmHg               | 102       | 100       | 110       | 100       | 105       |
| NYHA                                         | 3         | 3         | 3         | 3         | 3         |
| <b>Echocardiography data</b>                 |           |           |           |           |           |
| Left ventricular ejection fraction,%         | 57        | 60        | 58        | 69        | 59        |
| Left atrial diameter,mm                      | 41        | 36        | 47        | 43        | 44        |
| Maximum interventricular septum Thickness,mm | 24        | 15        | 17.8      | 17        | 22        |
| LV end-diastolic diameter, mm                | 48        | 51        | 52        | 41        | 44        |
| <b>Durg treatment</b>                        |           |           |           |           |           |
| β-Blockers                                   | NO        | YES       | NO        | NO        | YES       |
| Calcium channel blockers                     | NO        | NO        | NO        | YES       | YES       |
| ACEI or ARB                                  | NO        | NO        | YES       | NO        | NO        |



demonstrates ATF3 signal was markedly detected in  $\text{Coll1a1}^+$  cardiac fibroblasts after Ang II infusion (black arrows). Bars=50  $\mu\text{m}$ . In enlarged image, Bars=25  $\mu\text{m}$ . (C) *In situ* hybridization upon Ang II infused hearts using a probe against ATF3 (blue) alone. A stitched version of a whole heart section was presented on the left. High magnification (200 x) images from the rectangular boxed area were presented on the right. Bars=100  $\mu\text{m}$  (right).

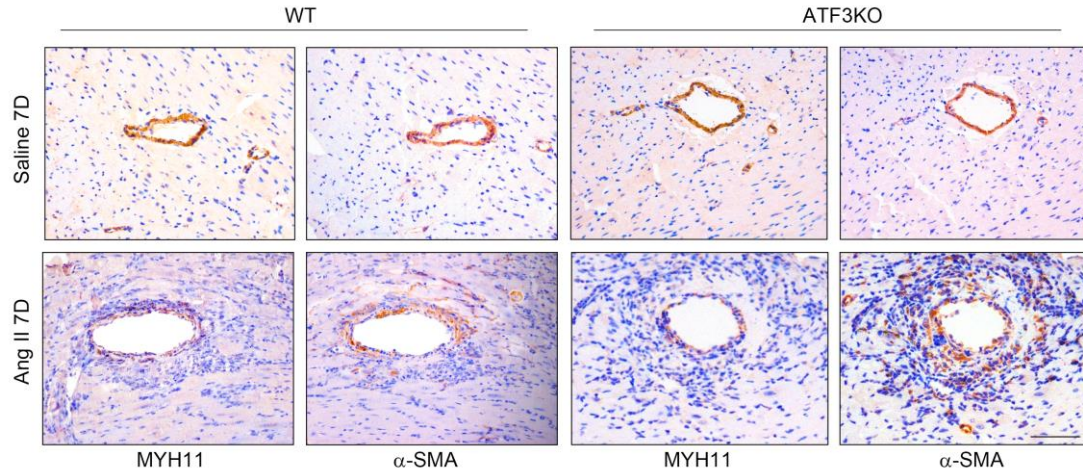

**Supplemental Figure 2. Expression of SM22 positive cells in WT and ATF3KO heart section**

MYH11 or  $\alpha$ -SMA expressions were assessed by immunohistochemistry on the serial sections from WT and ATF3KO heart tissue after saline or Ang II infusion for 7 days.

Bars=50  $\mu$ m.



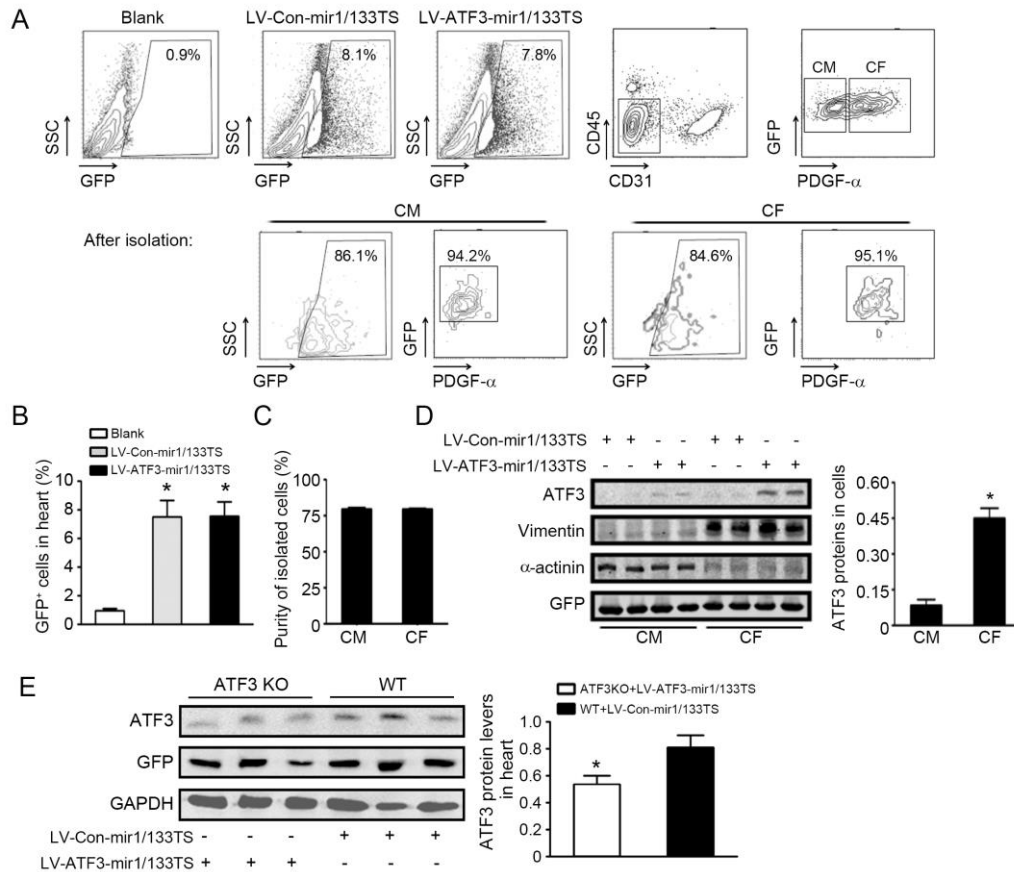

### Supplemental Figure 3. ATF3 expression in mice transduced with LV-ATF3/con-mir1/133TS

(A) ATF3 KO mice were injected with saline, LV-Con-mir1/133TS, LV-ATF3-mir1/133TS ( $3 \times 10^8$  PFU/mice) followed by Ang II infusion for 7 days, respectively. The efficiency of viral transduction in heart and the purity of isolated cardiomyocytes (CM) and cardiac fibroblasts (CF) were evaluated by flow cytometry. (B) GFP<sup>+</sup> cells accounted for about 5-10% of total cells in mouse heart with viral transduction.  $*p < 0.05$  compared to ATF3KO+saline (n=6-8 mouse/per group). (C) Gated on GFP<sup>+</sup>CD45<sup>-</sup>CD31<sup>-</sup> cardiac cells from ATF3KO mice injected with LV-Con-mir1/133TS or LV-ATF3-mir1/133TS, we isolated PDGFR $\alpha$ <sup>+</sup> CF and PDGFR $\alpha$ <sup>-</sup> CM. The purity of GFP<sup>+</sup> CF and GFP<sup>+</sup> CM were over 75%. (D) ATF3 proteins expression was evaluated in the cardiomyocytes and cardiac fibroblasts isolated from ATF3 mice transduced with LV-Con-mir1/133TS or LV-ATF3-mir1/133TS.  $*p < 0.05$  compared to ATF3KO CM+LV-ATF3-mir1/133TS (n=6-8 mouse/per group). (E) ATF3KO and WT mice were injected

with LV-ATF3-mir1/133TS or LV-Con-mir1/133TS ( $3 \times 10^8$ PFU/mice), followed by Ang II infusion for 7 days, respectively. Cardiac ATF3 expression was assessed by western-blot. LV-ATF3-mir1/133TS transduction restored ATF3 expression in ATF3KO mice, reached 68% of WT mouse ATF3 expression.  $*p < 0.05$  compared to WT+ LV-Con-mir1/133TS. Statistical significance was determined by the unpaired t test. Statistical significance was determined by the unpaired t test (B, D).

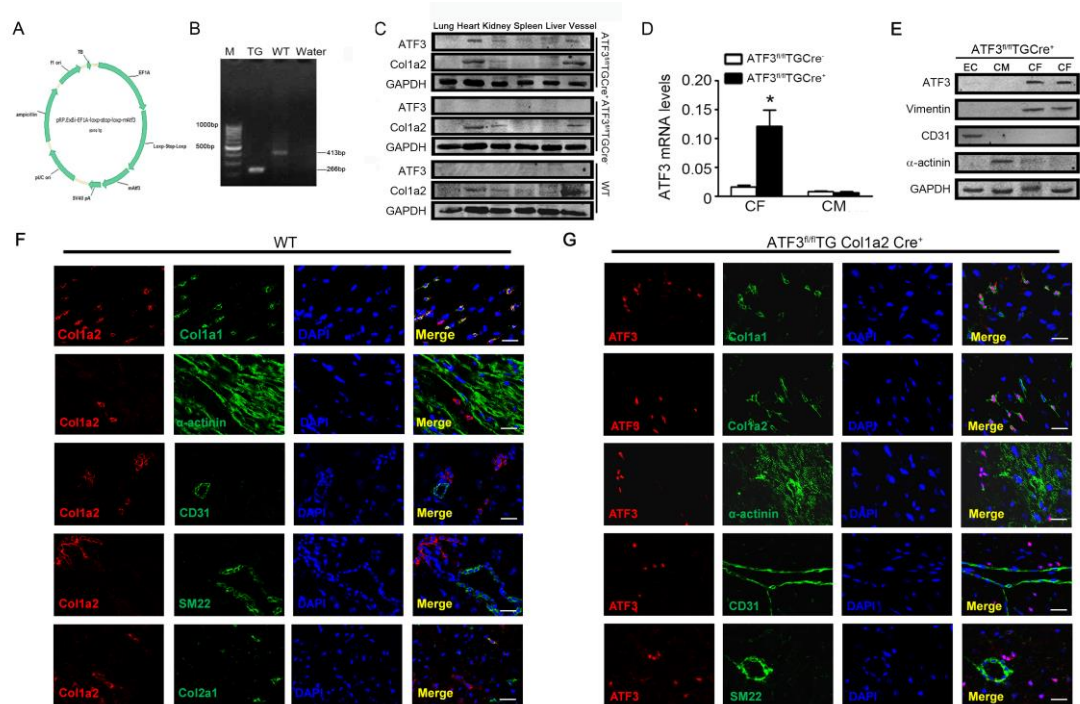

#### Supplemental Figure 4. Identification of cardiac fibroblast-specific ATF3 overexpression

(A) The scheme for construction of the pRP.ExBi-EF1A-loxp-stop-loxp-mAtf3 vectors. (B) ATF3 transgene was confirmed by genotyping. PCR of genomic DNA from wild type (WT) and ATF3 fl/fl TG mice was performed using specific primers for ATF3 overexpression (216 bp) and internal reference (IR; 413 bp). (C) ATF3 protein expression was assessed in the different tissues (lung, heart, kidney, spleen, liver, and vessel) isolated from ATF3<sup>fl/fl</sup> TG Cre<sup>+</sup> mice with tamoxifen administration using western-blot. (D) Col1a2 and ATF3 expression was evaluated in heart, liver, lung, kidney, spleen, and vessels from ATF3<sup>fl/fl</sup>TGCol1a2 Cre<sup>+</sup>, ATF3<sup>fl/fl</sup>TGCol1a2 Cre<sup>-</sup> and WT mice. (E) ATF3 expression was measured in cardiac fibroblast or cardiomyocyte isolated from ATF3<sup>fl/fl</sup> TG Cre<sup>-</sup> and ATF3<sup>fl/fl</sup> TG Cre<sup>+</sup> mice with tamoxifen administration using qRT-PCR. Data represent the average of 3 independent experiments. (F) We isolated the cardiac fibroblasts (PDGFR $\alpha$ <sup>+</sup>CD31<sup>-</sup>CD45<sup>-</sup>), cardiomyocytes (PDGFR $\alpha$ <sup>-</sup>CD31<sup>-</sup>CD45<sup>-</sup>) and endothelial cells (PDGFR $\alpha$ <sup>-</sup>CD31<sup>+</sup>CD45<sup>-</sup>) from ATF3<sup>fl/fl</sup>TG Col1a2 Cre<sup>+</sup> mice and tested the ATF3 proteins expression. (G) Hearts of sham WT mice were immunofluorescent stained to determine expression of Col1a2 (red) in Col1a1 (cardiac

fibroblasts),  $\alpha$ -actinin (cardiomyocytes), CD31 (endothelial cells), SM22 (smooth muscle cells) and Col2a1 (valve cells)-positive cells. Scale bar=10  $\mu$  m. All Col1a2<sup>+</sup> expressing cells are Col1a1<sup>+</sup> positive cardiac fibroblasts (First row). Col1a2<sup>+</sup> cells are negative for cardiomyocyte, endothelial, and smooth muscle marker staining (rows 2-4). A small portion of Col1a2<sup>+</sup> cells are co-stained with Col2a1 (valve cell marker, last row). **(G)** Immunofluorescent staining of hearts from sham ATF3<sup>fl/fl</sup>TG Col1a2Cre<sup>+</sup> mice after tamoxifen injection, assessing ATF3 (red) expression in Col1a2, CD31, SM22, and Col1a2-positive cells. All cells expressing ATF are Col1a1<sup>+</sup> or Col1a2<sup>+</sup> positive cardiac fibroblasts. Scale bar=10 $\mu$ m. \* $p$ <0.05 compared to CF in ATF3<sup>fl/fl</sup>TG Cre<sup>-</sup>. Statistical significance was determined by the unpaired t test (D).

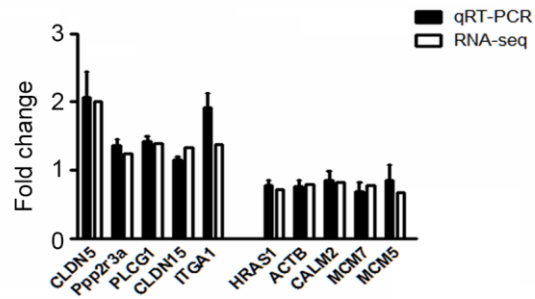

**Supplemental Figure 5. Comparison of DEGs expression using RNA-seq and qRT-PCR**

The expression of DEGs identified from the comparison between WT and ATFKO CF were confirmed by qRT-PCR. X-axis represents 10 randomly selected genes for qRT-PCR assays and Y-axis represents the fold change derived from RNA-Seq and qRT-PCR. Data represent the average of 3 independent experiments.

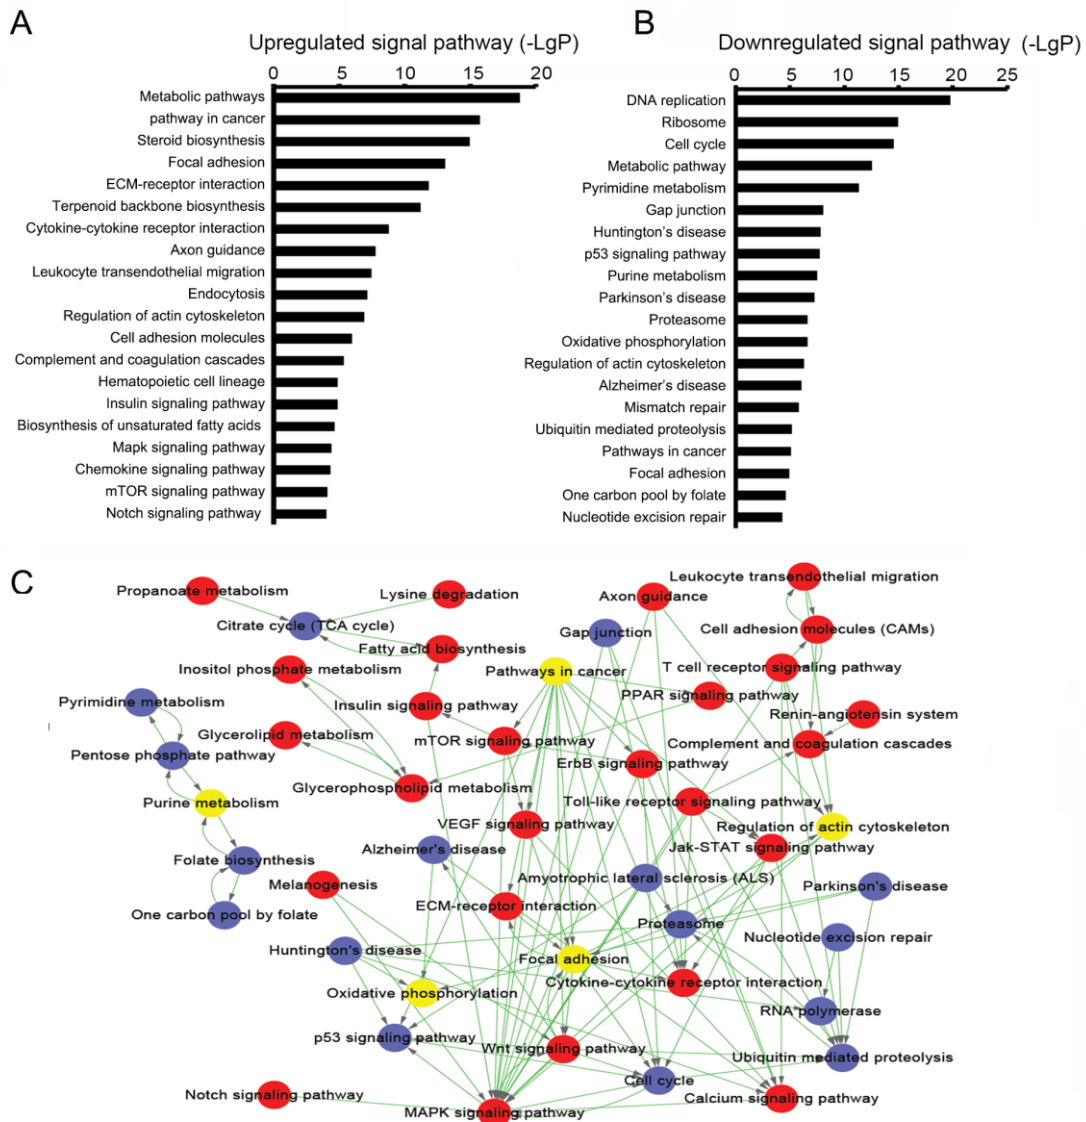

**Supplemental Figure 6: MAPK is an important down-stream pathway of ATF3, as determined by RNA-seq analysis**

Cardiac fibroblasts were isolated from WT and ATF3 KO mice after Ang II infusion for 7 days. Genome-wide RNA-Seq in cardiac fibroblasts was performed and analyzed with the KEGG pathway database. **(A, B)** Pathway analysis commenced, based upon DEGs identified from comparison of ATF3KO and WT cardiac fibroblasts. Significant pathways were targeted by upregulated and downregulated DEGs. The vertical axis is the pathway category, and the horizontal axis is the enrichment of pathways. **(C)** The Path-Net of significant pathways in the ATF3KO versus WT cardiac fibroblasts is shown ( $P < 0.05$ ). 47 of 107 significant pathways were chosen to build the Path-Net;

potential interactions between the pathways were evaluated using Degree. Red dots represent significantly upregulated pathways, blue dots represent significantly downregulated pathways, and yellow dots represent other relevant pathways. Lines represent pathway interactions.

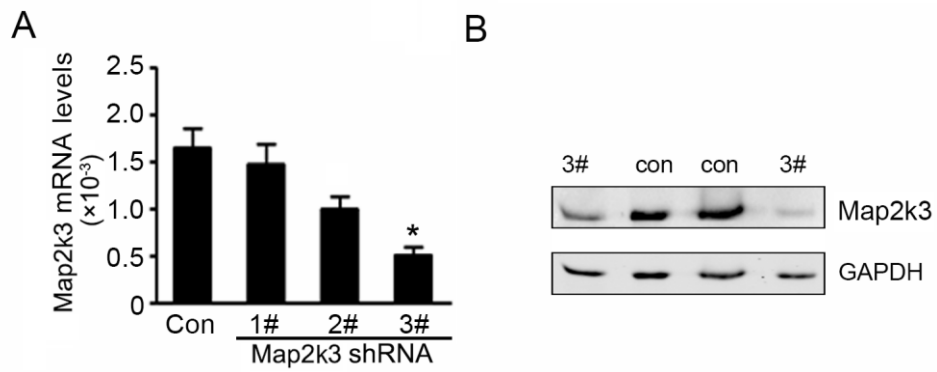

**Supplemental Figure 7. Inhibited efficiency of Map2K3 shRNA**

**(A,B)** Cardiac fibroblast was transfected the lentivirus expressing a Map2K3 shRNA (LV-Map2K3-shRNA) or empty (LV-con-shRNA) for 72 hours, then the Map2K3 mRNA and protein expression was determined by qRT-PCR and western blot analysis. Data represent the average of 3 independent experiments. \* $p < 0.05$  compared to Control shRNA. Statistical significance was determined by 1-way ANOVA test (A).



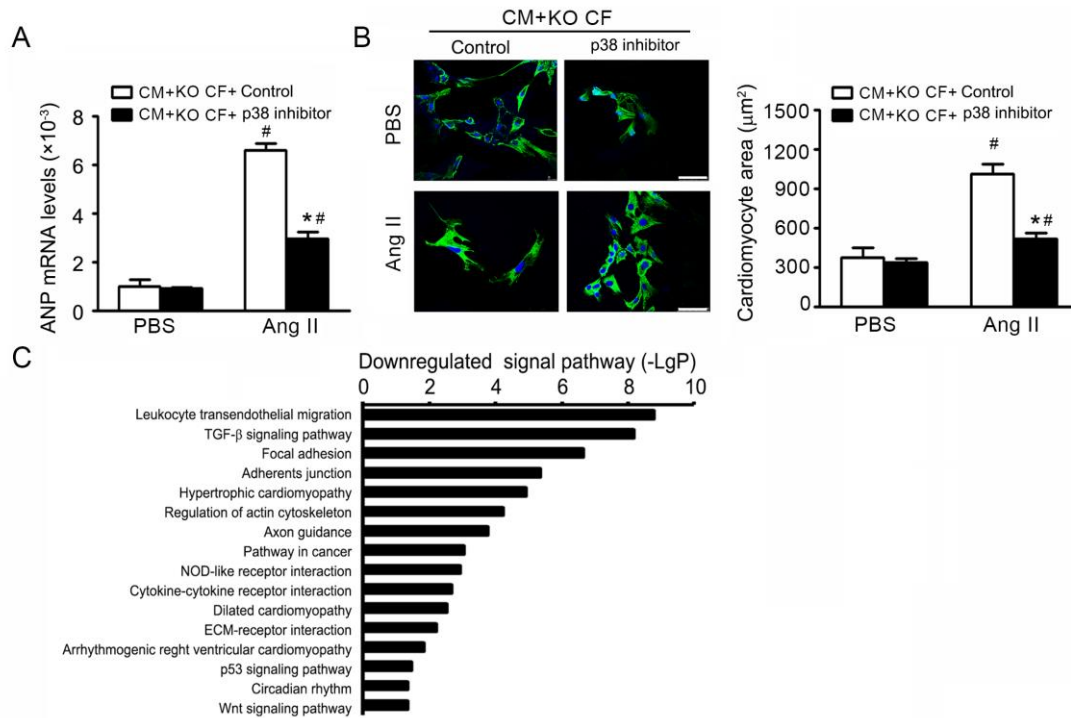

**Supplemental Figure 8. Pathway analysis and TGF- $\beta$  signaling-related DEGs in fibroblast treated with p38 inhibitor**

(A-B) CMs were treated with supernatant from ATF3 KO cardiac fibroblasts pretreated with p38 inhibitor or control, with or without Ang II. ANP mRNA expression and cardiomyocyte area were evaluated. \* $p < 0.05$  compared with CM+KO CF + Ang II. <sup>#</sup> $P < 0.05$  vs CM+KO CF+PBS. All data represent the average of 3 independent experiments. (C) Cardiac fibroblasts were treated with or without a p38 inhibitor. We completed RNA-seq analysis, and 438 upregulated and 470 downregulated DEGs ( $p < 0.05$ , fold change  $> 1.2$ ) were detected. Pathway analysis commenced, based upon downregulated DEGs identified from comparisons between Ang II stimulated-CF pretreated with or without p38 inhibitor. The vertical axis is the pathway category, and the horizontal axis is the enrichment of pathways. Statistical significance was determined by 1-way ANOVA test (A and B).

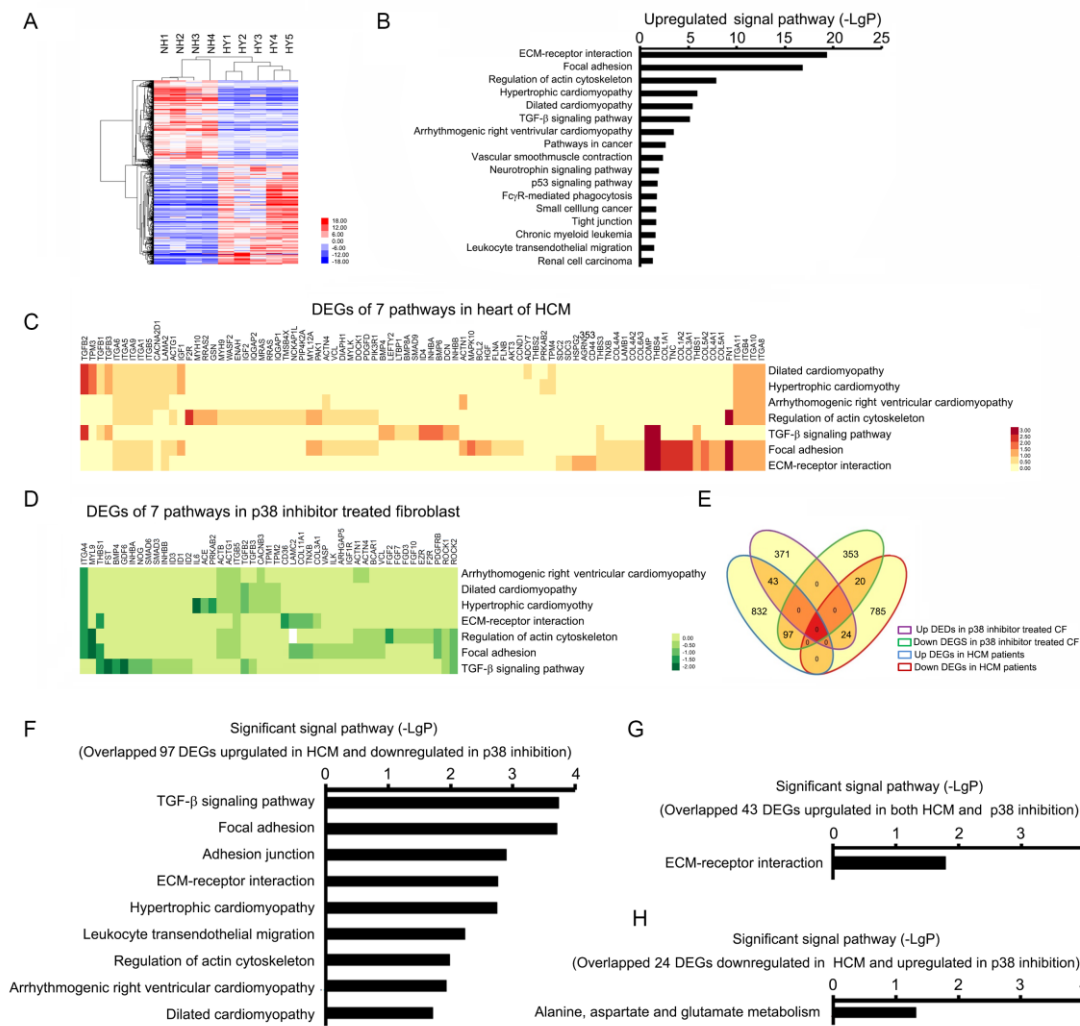

## Supplemental Figure 9. Pathway analysis in overlapped DEGs between heart from HCM and cardiac fibroblast treated with p38 inhibitor

We performed cross-species transcriptome analysis HCM patient and normal hearts, and of Ang II-stimulated CF pretreated with or without a p38 inhibitor. **(A)** Hierarchical clustering of DEGs in heart tissue from HCM patient (n=5) or normal heart (n=4). **(B)** Pathway analysis of DEGs in HCM heart classified and arranged per statistical significance. **(C,D)** Heat map of the TGF- $\beta$  signaling pathway, ECM-receptor interaction, focal adhesion, hypertrophic cardiomyopathy pathway, arrhythmogenic right ventricular cardiomyopathy, regulation of actin cytoskeleton, and dilated cardiomyopathy genes identified by KEGG analysis, as differentially expressed by p38-regulated cardiac fibroblasts and the HCM heart. Each point reveals the calculated Log<sub>2</sub> ratio (HCM/control, p38 inhibitor treatment/control) of the transcription of a gene.

Genes with enhanced transcription are shown in red, and genes with repressed transcription are green. **(E)** Overlap between p38-regulated DEGs identified in cardiac fibroblasts after p38 inhibitor treatment, and HCM-regulated DEGs in HCM. **(F-H)** The KEGG pathway analysis was performed based on the 4 groups of overlapped DEGs. Significant pathways was shown, based 97 DEGs upregulated in heart of HCM but downregulated in p38 inhibitor treated cardiac fibroblast **(F)**; based 43 DEGs upregulated in both heart of HCM and p38 inhibitor treated cardiac fibroblast **(G)**; based 24 DEGs downregulated in heart of HCM but upregulated in p38 inhibitor treated cardiac fibroblast **(H)**. There is no significant pathway in 20 DEGs downregulated in both heart of HCM and p38 inhibitor treated cardiac fibroblast.

## Supplemental References

1. Hartman MG, Lu D, Kim ML, Kociba GJ, Shukri T, Buteau J, Wang X, Frankel WL, Guttridge D, Prentki M, Grey ST, Ron D, Hai T. Role for activating transcription factor 3 in stress-induced  $\beta$ -cell apoptosis. *Mol Cell Biol.* 2004;24:5721-5732.
2. Noda S, Asano Y, Nishimura S, Taniguchi T, Fujiu K, Manabe I, Nakamura K, Yamashita T, Saigusa R, Akamata K, Takahashi T, Ichimura Y, Toyama T, Tsuruta D, Trojanowska M, Nagai R, Sato S. Simultaneous downregulation of *klf5* and *fli1* is a key feature underlying systemic sclerosis. *Nat Commun.* 2014;5:5797.
3. Zhang C, Li Y, Wang C, Wu Y, Cui W, Miwa T, Sato S, Li H, Song WC, Du J. Complement 5a receptor mediates angiotensin ii-induced cardiac inflammation and remodeling. *Arterioscler Thromb Vasc Biol.* 2014;34:1240-1248.
4. Ting DT, Lipson D, Paul S, Brannigan BW, Akhavanfard S, Coffman EJ, Contino G, Deshpande V, Iafrate AJ, Letovsky S, Rivera MN, Bardeesy N, Maheswaran S, Haber DA. Aberrant overexpression of satellite repeats in pancreatic and other epithelial cancers. *Science.* 2011;331:593-596.
5. Yi M, Horton JD, Cohen JC, Hobbs HH, Stephens RM. Whole pathwayscope: A comprehensive pathway-based analysis tool for high-throughput data. *BMC Bioinformatics.* 2006;7:30.
6. Feng J, Liu T, Qin B, Zhang Y, Liu XS. Identifying chip-seq enrichment using macs. *Nat Protoc.* 2012;7:1728-1740.
7. Li Y, Zhang C, Wu Y, Han Y, Cui W, Jia L, Cai L, Cheng J, Li H, Du J. Interleukin-12p35 deletion promotes cd4 t-cell-dependent macrophage differentiation and enhances angiotensin ii-induced cardiac fibrosis. *Arterioscler Thromb Vasc Biol.* 2012;32:1662-1674.
8. Li Y, Wu Y, Zhang C, Li P, Cui W, Hao J, Ma X, Yin Z, Du J.  $\gamma\delta$ T cell-derived interleukin-17a via an interleukin-1 $\beta$ -dependent mechanism mediates cardiac injury and fibrosis in hypertension. *Hypertension.* 2014;64:305-314.
9. Wu Y, Li Y, Zhang C, A X, Wang Y, Cui W, Li H, Du J. S100a8/a9 released by CD11b+Gr1+ neutrophils activates cardiac fibroblasts to initiate angiotensin ii-induced cardiac inflammation and injury. *Hypertension.* 2014;63:1241-1250.
